1 **Analysis of CHD-7 defective dauer nematodes implicates collagen misregulation in CHARGE**  
2 **syndrome features.**

3

4 Diego M. Jofré<sup>1\*</sup>, Dane K. Hoffman<sup>2\*§</sup>, Ailen S. Cervino<sup>3</sup>, McKenzie Grundy<sup>2</sup>, Sijung Yun<sup>4</sup>, Francis RG.  
5 Amrit<sup>5</sup>, Donna B. Stolz<sup>6</sup>, Esteban Salvatore<sup>7</sup>, Fabiana A. Rossi<sup>8</sup>, Arjumand Ghazi<sup>5,9</sup>, M. Cecilia Cirio<sup>3</sup>,  
6 Judith L. Yanowitz<sup>2,10#</sup>, Daniel Hochbaum<sup>1#</sup>

7 \*Authors contributed equally.

8 #Co-corresponding authors.

9 <sup>1</sup> Departamento de Biodiversidad y Biología Experimental, Facultad de Ciencias Exactas y  
10 Naturales, Universidad de Buenos Aires (UBA). Buenos Aires, Argentina.

11 <sup>2</sup> Magee-Womens Research Institute. Pittsburgh, PA, USA.

12 <sup>3</sup> Instituto de Fisiología, Biología Molecular y Neurociencias (IFIBYNE-UBA-CONICET), Facultad de  
13 Ciencias Exactas y Naturales, Universidad de Buenos Aires (UBA). Buenos Aires, Argentina.

14 <sup>4</sup> Laboratory of Molecular Biology, National Institute of Diabetes and Digestive and Kidney Diseases,  
15 National Institutes of Health. Bethesda, Maryland, USA.

16 <sup>5</sup> Department of Pediatrics, University of Pittsburgh School of Medicine. Pittsburgh, PA, USA.

17 <sup>6</sup> Center for Biologic Imaging, University of Pittsburgh Medical School. Pittsburgh, PA, USA.

18 <sup>7</sup> mAbxience S.A.U. Buenos Aires, Argentina.

19 <sup>8</sup> Instituto de Investigaciones en Medicina Traslacional (IIMT) - CONICET, Universidad Austral. Pilar,  
20 Buenos Aires, Argentina.

21 <sup>9</sup> Departments of Developmental Biology and Cell Biology & Physiology, University of Pittsburgh School of  
22 Medicine. Pittsburgh, PA, USA.

23 <sup>10</sup> Departments of Obstetrics, Gynecology & Reproductive Sciences; Developmental Biology; Microbiology  
24 and Molecular Genetics at the Hillman Cancer Center, University of Pittsburgh. Pittsburgh, PA, USA.

25 <sup>§</sup>Current Address: Department of Cancer & Cell Biology. Baylor College of Medicine. Houston, Texas,  
26 USA.

27

28

29

30

31

32

33

34

35

36 **\*Correspondence:** Correspondence should be addressed to

37

38 Dr. Daniel Hochbaum

39 Ciudad Universitaria. Intendente Guiraldes 2160, 4 piso. Laboratorio 79

40 CABA, Buenos Aires.

41 C1428BGA

42 Argentina

43 hochbaumd@bg.fcen.uba.ar

44

45 Dr. Judith L. Yanowitz

46 Magee-Womens Research Institute

47 204 Craft Avenue

48 Pittsburgh, PA

49 15213

50 United States of America

51 yanowitzjl@mwri.magee.edu

52

### 53 **Author Contributions**

54 Conceived and designed the experiments: DMJ, DKH, ASC, FAG, ES, MCC, JLY, DH. Performed the  
55 experiments: DMJ, DKH, ASC, MG, FRGA, DBS, ES, FAR, DH. Analyzed the data: DMJ, DKH, ASC, SY,  
56 FRGA, AG, MCC, JLY, DH. Drafted the manuscript: MCC, JLY, DH. Reviewed and edited the manuscript:  
57 DMJ, DKH, AG, MCC, JLY, DH.

58

### 59 **Conflict of Interest**

60 The authors declare no conflicts of interest

61

62 **Classification:** Biological Sciences, Developmental Biology.

63

64 **Keywords:** CHARGE Syndrome, *C. elegans*, dauer, TGF- $\beta$ , Col2a1

65

### 66 **This PDF file includes:**

67 Main Text

68 Figures 1 to 5

69 Supplementary figures 1-6 and Supplementary Tables S1-S4

70

71 **ABSTRACT**

72

73 CHARGE syndrome is a complex developmental disorder caused by mutations in the  
74 chromodomain helicase DNA-binding protein7 (CHD7) and characterized by retarded growth and  
75 malformations in the heart and nervous system. Despite the public health relevance of this disorder,  
76 relevant targets of CHD7 that relate to disease pathology are still poorly understood. Here we report that  
77 *chd-7*, the nematode ortholog of Chd7, is required for dauer morphogenesis, lifespan determination, and  
78 stress response. Consistent with our discoveries, we found *chd-7* to be allelic to *scd-3*, a previously  
79 identified dauer suppressor from the TGF- $\beta$  pathway. Notably, DAF-12 promoted *chd-7* expression, which  
80 is necessary to repress *daf-9* for execution of the dauer program. Transcriptomic analysis comparing *chd-*  
81 *7*-defective and normal dauers showed enrichment of collagen genes, consistent with a conserved role  
82 for the TGF- $\beta$  pathway in formation of the extracellular matrix. To validate a conserved function for *chd-7*  
83 in vertebrates, we used *Xenopus laevis* embryos, an established model to study craniofacial  
84 development. Morpholino mediated knockdown of Chd7 led to a reduction in *col2a1* mRNA levels. Both  
85 embryonic lethality and craniofacial defects in Chd7-depleted tadpoles were partially rescued by over-  
86 expression of *col2a1* mRNA. We suggest that pathogenic features of CHARGE syndrome caused by  
87 Chd7 mutations, such as craniofacial malformations, result from the reduction of collagen levels, implying  
88 that the extracellular matrix might represent a critical target of Chd7 in CHARGE development.

89

90 **SIGNIFICANCE STATEMENT**

91

92 CHARGE Syndrome is a complex developmental disorder caused by mutations in the  
93 chromodomain helicase DNA-binding protein-7 (CHD7). Unfortunately, the cellular events that lead to  
94 CHARGE syndrome are still poorly understood. In *C. elegans*, we identified *chd-7* in a screen for  
95 suppressors of dauer formation, an alternative larval stage that develops in response to sensory signals  
96 of a harsh environment. We found that *chd-7* regulates expression of collagens, which constitute the  
97 worm's cuticle, a specialized extracellular matrix. In frog's embryos, we show that Chd7 inhibition leads to  
98 poor Col2a1, which is necessary and sufficient to exhibit CHARGE features. These studies establish *C.*  
99 *elegans* as an amenable animal model to study the etiology of the developmental defects associated with  
100 pathogenic Chd7.

101

102

103 **INTRODUCTION**

104

105 CHARGE syndrome is a rare and severe neurodevelopmental disorder that affects the neural  
106 tube and neural crest cell derivatives, leading to hypogonadism, heart defects and craniofacial anomalies  
107 among other features (1). Inactivating mutations in *CHD7* (chromodomain-helicase-DNA binding 7) are  
108 the predominant cause of CHARGE, accounting for greater than 90% of the cases (2). *CHD7* is also  
109 mutated in Kallmann syndrome, a milder neurodevelopmental disorder with features overlapping with  
110 CHARGE, including impaired olfaction and hypogonadism (3). Exome sequencing studies in patients with  
111 autism spectrum disorders (ASDs) identified recurrent disruptive mutations in the related gene *CHD8* (4).  
112 The CHD proteins comprise a highly conserved family of SNF2-related ATP-dependent chromatin  
113 remodelers that are involved in chromatin remodeling and transcriptional regulation (5). Despite the public  
114 health relevance of these cognitive disorders, the mechanism of disease pathology due to mutations in  
115 *CHD7/8* is poorly understood. The development of fly, fish and mouse models of CHARGE has abetted in  
116 characterization of associated dysfunction, but our understanding of the underlying pathology of  
117 CHARGE is still incomplete (6–11). CHD-7 is the ortholog of human CHD7 and CHD8 in *Caenorhabditis*  
118 *elegans* and has functions in habituation learning, normal locomotion, body size and fecundity (12, 13). It  
119 contains a conserved ATPase/SNF2 domain and two chromodomains for nucleosome interaction. Being  
120 the only worm homolog of the Class III CHD family, it contains a signature BRK domain (Brahma and  
121 Kismet domain) (Figure 1E).

122 When *C. elegans* encounter crowding, starvation or high temperature during early development,  
123 worms can halt reproductive programs to enter an alternative larval stage known as dauer. Dauers are  
124 long-lived, highly stress resistant and exhibit altered motility and metabolism (14–17). Upon return to  
125 normal growth conditions, the larvae exit dauer and develop into fertile adults. Study of dauer formation  
126 mutants has provided fundamental insights into pathways affecting longevity, neurodevelopment,  
127 metabolism, autophagy and neurodegeneration (14, 17–20).

128 The DAF-2/insulin/IGF- signaling 1 (IIS) pathway controls the dauer entry decision by coupling  
129 external cues with neuroendocrine signaling (21). In favorable conditions, DAF-2 activity initiates a  
130 conserved kinase cascade, leading to phosphorylation and inhibition of the transcription factor DAF-  
131 16/FOXO. In harsh environments, a decrease in the activity of DAF-2 and downstream components of the  
132 pathway leads to activation of DAF-16 and causes animals to arrest as dauers (22, 23). In addition to the  
133 DAF-2 pathway, DAF-7/ TGF- $\beta$  signaling also regulates dauer development (24). When worms sense  
134 suitable conditions for reproductive development, ASI neurosensory cells secrete DAF-7, which binds to  
135 DAF-1/4 receptors leading to activation and phosphorylation of the R-SMAD complex DAF-8/14,  
136 promoting reproductive programs and inhibiting the pro-dauer complex composed of the SMAD protein  
137 DAF-3 and repressor DAF-5. Conversely, absence of DAF-7 leads to activation of the DAF-3/DAF-5  
138 complex to promote dauer entry (25, 26).



139 DAF-7/TGF- $\beta$  and DAF-2/IIS pathway were initially described as parallel pathways to regulate dauer entry  
140 (27), but recent observations suggest a strong positive feedback between these pathways for dauer entry  
141 and longevity (15–20). First, decreased signaling through the TGF- $\beta$  pathway leads to differential  
142 expression of many DAF-16 regulated genes with functions in longevity and dauer entry, such as SOD-3  
143 or insulin peptides. This cross-activation of target genes may be important to amplify weak signals from  
144 each sensory pathway to make an all-or-none decision to enter dauer (28–30). Second, the longevity of  
145 *daf-2* mutants can be blocked or enhanced by *daf-5* and *daf-3*, respectively, suggesting that  
146 transcriptional components of the TGF- $\beta$  can modulate IIS-dependent longevity genes. Third, for dauer  
147 development, *daf-16* is epistatic to *daf-7/8/14 daf-c* mutants (30, 31). Lastly, both signaling pathways  
148 converge on *daf-9* and *daf-12* to integrate outputs for diapause entry (32, 33). Indeed, *daf-9* expression  
149 levels is critical for both entering and exiting diapause (17, 32).

150 In chromatin immunoprecipitation (ChIP)-chip studies, we identified *chd-7* as a DAF-12 target  
151 gene whose loss caused defective execution of dauer morphogenesis programs (34). We show that while  
152 CHD-7 can modulate multiple IIS-associated processes, including *daf-2(e1370)* dauer formation,  
153 longevity and immunity, epistatic experiments place *chd-7* in the DAF-7/TGF- $\beta$  pathway. Whole genome  
154 mRNA expression profiling of partial dauers show that *chd-7* mutants fail to repress *daf-9* during dauer  
155 development, preventing developmental arrest of the constitutive dauer mutant *daf-7(e1372)*. In addition,  
156 we found collagens to be among the most differentially regulated genes, consistent with a known role for  
157 the TGF- $\beta$  pathway in regulating components of the extracellular matrix (35). To validate a conserved  
158 function for *chd-7* in vertebrates and study the relevance of our results for CHARGE etiology, we used  
159 *Xenopus laevis*. Disruption of *Chd7* function in *Xenopus* embryos results in craniofacial defects that mimic  
160 CHD-dependent pathological phenotypes (36, 37). We demonstrate that *Chd7* regulates expression of  
161 the collagen type-II, alpha 1, *col2a1*, the main collagen protein of cartilage (38). Interestingly, craniofacial  
162 malformations and embryonic lethality due to *chd7* knockdown can be rescued by *col2a1* expression.  
163 These findings suggest a conserved function of *chd7/chd-7* in regulation of extracellular matrix  
164 components and raise the intriguing possibility that defects in collagen expression may contribute to the  
165 craniofacial defects seen in CHD7/8-dependent syndromes.

166

## 167 RESULTS

168

### 169 ***chd-7* functions in development of the dauer larva**

170 Previously, we identified ~3000 potential DAF-12 target genes by ChIP-chip (34). We reasoned  
171 that among these genes would be novel regulators of dauer development. To identify such genes, we  
172 took advantage of the temperature-sensitive, constitutive dauer (Daf-c) allele *daf-2(e1371)*. At the non-  
173 permissive temperature of 25°C, all the offspring enter the dauer phase and become SDS resistant (22).  
174 We expected that inactivating targets of DAF-12 that function in dauer formation should suppress the Daf-

175 c phenotype of *daf-2* and produce either defective, SDS-sensitive “partial” dauers or reproductive adults.  
176 To confirm these results, we assayed suppression of the more severe *daf-2(e1370)* mutation and  
177 discovered that *chd-7(RNAi)* produced arrested, SDS-sensitive larvae, indicative of the partial dauer  
178 phenotype (39). As observed in Figure 1A and B, the axial ratio (length/width) of the partial dauers  
179 resulting from *chd-7(RNAi)* exhibited a significant reduction of these proportions and appeared to have  
180 defects in radial constriction of the dauer cuticle. By using a *chd-7* transcriptional reporter  
181 (WBStrain00033709), we observed a substantial decrease in *chd-7* expression in the *daf-12(rh61rh411)*  
182 background (Figure 1C and D). Thus, we infer that DAF-12 binds to the *chd-7* promoter (34) and  
183 upregulates its expression.

184 To further validate our screen, we crossed *daf-2(e1370)* mutants with three *chd-7* deletion alleles  
185 available from the Nematode Knockout Consortia (40). Allele *chd-7(tm6139)* contains a 594bp deletion  
186 that generates a frame shift and premature stop codon, eliminating all known protein domains (Figure  
187 1E). As shown in Figure 1F, SDS-sensitive dauers were obtained when double mutants are grown at  
188 25°C, validating our screen. Comparison of two partial deletion alleles uncovered a critical role for the  
189 BRK domain in dauer formation. The *chd-7(gk290)* allele contains a 859bp deletion that spans the BRK  
190 domain and introduces a frameshift that eliminates the last 356aa. The *chd-7(gk306)* deletion is slightly  
191 more C-terminal, truncating the protein immediately after the BRK domain (Figure 1E). When crossed into  
192 *daf-2(e1370)* worms, *chd-7(gk306)* developed normal, SDS-resistant dauer larvae, whereas *chd-7(gk290)*  
193 formed partial dauers that were sensitive to detergent (Figure 1F). Importantly, a functional transgene  
194 expressing GFP-tagged CHD-7 protein (CHD-7::GFP) rescued the partial dauer phenotypes observed in  
195 *chd-7(gk290);daf-2(e1370)* and *chd-7(tm6139);daf-2(e1370)* mutants (Figure 1F).

196 The dauer larva is characterized by a slim physique because of a reduction in the volume of  
197 ectodermal tissues, including the hypodermis, seam cells and pharyngeal cells. In addition, the  
198 hypodermis produces the dauer cuticle, which confers protection against external damage and  
199 dehydration. During development, the seam cells fuse and the multinucleate cells produce the alae-  
200 bilateral ridges in the cuticle that facilitate body motion. Dauer larvae also switch their metabolism to  
201 accumulate lipids to survive for longer periods. To further characterize the nature of the defects in the  
202 *chd-7*-induced partial dauers, we first studied the seam cells fusions with the adherens junction-  
203 associated protein marker AJM-1::GFP and the morphology of the cuticle with scanning electron  
204 microscopy (SEM). In dauer preparation, animals store fat in their intestinal and hypodermal cells,  
205 which is critical to survive during hibernation (41). As shown in Figure 1G, partial dauers exhibited defects  
206 in seam cell fusion and defective dauer alae formation. Next we used the lipid-labeling dye, Oil Red O  
207 (ORO), to examine fat storage and found that, unlike other partial dauer mutants (19), the *chd-7;daf-2*  
208 abnormal dauers did not exhibit fat-storage deficiencies (Supplemental Figure 1).

209 During dauer, the global developmental arrest also impacts the germ cells, slowing their divisions  
210 and finally remaining quiescent (42). We observed that the germ line in *chd-7* mutant dauers was

211 substantially larger than in control dauers and appeared to arrest with a germline morphology resembling  
212 that seen in L3 larval stage (Figure 1H). Therefore, we conclude that major morphological changes that  
213 occur during dauer formation fail to be executed in *chd-7* mutants, including radial constriction of the  
214 body, formation of an SDS-resistant cuticle with dauer alae, and developmental arrest of the germ line.

215

### 216 ***chd-7* is required for longevity and immunoresistance induced by IIS inactivation and germline** 217 **removal**

218 In addition to dauer development, the IIS pathway also regulates longevity (14). Hence, we  
219 sought to investigate whether *chd-7* also has roles in the determination of lifespan. First, we compared  
220 survival of wild-type (N2) worms with two *chd-7* alleles and found that the dauer-defective allele *chd-*  
221 *7(gk290)* significantly shortened lifespan, whereas *chd-7(gk306)* had only a marginal effect on longevity  
222 (Figure 2A). Surprisingly, the CHD-7::GFP rescue transgene also reduced N2 lifespan (Figure 2B),  
223 suggesting that *chd-7* copy number can influence longevity. We then analyzed how *chd-7* affects  
224 longevity of IIS mutants. Remarkably, the dauer suppressor allele *chd-7(gk290)*, but not *chd-7(gk306)*,  
225 shortened the lifespan extension of *daf-2* mutants to an extent comparable with the null allele of *daf-16*,  
226 the key IIS downstream target (Figure 2C) (14). Furthermore, *daf-2* longevity was fully restored by CHD-  
227 7::GFP (Figure 2D).

228 To determine if the effects on lifespan were specific to the IIS pathway, we assayed the  
229 contribution of *chd-7* to the longevity induced by germ cell-less mutations, a longevity paradigm that  
230 operates in parallel to IIS. Temperature-sensitive *glp-1(e2144)* animals are sterile and long-lived at non-  
231 permissive temperatures (43). This lifespan extension was dependent on *chd-7*, as *chd-7(gk290);glp-*  
232 *1(e2144)* double mutants had a mean lifespan significantly shorter than *glp-1(e2144)* single mutants  
233 (Figure 2E). The impact was similar to that produced by absence of the nuclear receptor *daf-12* (Figure  
234 2C), which is strictly necessary for germless longevity (43).

235 In addition to longevity, IIS reduction also enhances resistance against multiple stressors  
236 including pathogen attack and starvation. We asked if *chd-7* inactivation impaired *daf-2*  
237 immunoresistance too. As shown in Figure 2F, *chd-7* mutants repressed the increased survival of *daf-2*  
238 worms upon exposure to the human opportunistic pathogen, *Pseudomonas aeruginosa* strain PA14 (44).  
239 In contrast, *chd-7* had a modest effect on survival of wild-type worms' pathogen resistance. Furthermore,  
240 the *chd-7(gk290)* and *chd-7(tm6139)* alleles reduced the survival of *daf-2(e1370)* L1 larvae subjected to  
241 starvation stress (Supplemental Figure 2) (45). Taken together, these results suggest that *chd-7* mediates  
242 the increased lifespan of at least two longevity paradigms (IIS mutants and germ cell-less animals), as  
243 well as the response to pathogens and starvation.

244

245

246

247 **CHD-7 is a member of the TGF- $\beta$  pathway**

248         Since our genetic analyses implicated *chd-7* as a dauer defective mutant (Daf-d) in the IIS  
249 signaling pathway (Figure 1), we sought to understand whether it also had roles in the TGF- $\beta$  dauer  
250 pathway (27, 28). As shown in Figure 3A, at the restrictive temperature of 25°C, *chd-7;daf-7(e1372)*  
251 double mutants bypassed the dauer arrest to become fertile adults. For *daf-5*, which acts as a dauer  
252 suppressor of the TGF- $\beta$  pathway, the Daf-d phenotype is observed at 25°C, but at a slightly higher  
253 temperature, suppression is incomplete (26). Thus, we asked whether *chd-7* also prevented dauer arrest  
254 at higher temperatures. As shown in Figure 3A, *daf-7*-dependent arrest was recapitulated at 26.5°C,  
255 suggesting that *chd-7* has a Hid (high temperature-induced dauer formation) phenotype (46). As expected  
256 for a putative transcriptional regulator, epistasis analysis placed CHD-7 downstream of the receptor DAF-  
257 1 and the R-Smad DAF-14 (Figure 3B).

258         In addition to dauer formation, the TGF- $\beta$  signaling pathway also regulates body size and male  
259 tale development, mainly through the ligand DBL-1 (47, 48). To test if *chd-7* impacted these processes as  
260 well, we measured the length of *chd-7* young adults and found them to be significantly shorter than N2  
261 control animals (Figure 3C). We also observed that males carrying the severe loss-of-function allele *chd-7(tm6139)*  
262 failed to mate with *fog-2* mutant females (Figure 3D) due to defects in male tail development  
263 (not shown). This male infertility was rescued by the CHD-7::GFP transgene (Figure 3D).

264         More than twenty years ago, in a screen for suppressors of dauer formation within the TGF- $\beta$   
265 pathway, *Inoue et al.* identified three complementation groups (31). We noticed that one of these, *scd-3*  
266 (suppressor of constitutive dauer-3), was located between *unc-11* and *dpy-5* on chromosome I, in the  
267 same genetic region as *chd-7*. Features of *scd-3(sa253)* worms include low brood size, egg-laying  
268 defects (Egl), short body size (Dpy) and male abnormal defects (Mab), all of which were phenotypes  
269 shared with *chd-7* as described above. In addition, improper gonad migration is a common phenotype of  
270 *scd-3* and *chd-7* mutants (Supplemental Figure 4). To determine if *chd-7* and *scd-3* are allelic, we  
271 sequenced *scd-3(sa253)* and found a single G/A mutation in exon 8 of the *chd-7* locus, that introduces a  
272 premature STOP codon at position Q2422, eliminating the BRK domain of CHD-7 protein, confirming that  
273 *chd-7* is *scd-3* (Figure 1E).

274

275 **Transcriptomics analysis identifies *daf-9* and collagens as targets of CHD-7**

276         To gain further insight into the role of CHD-7 in dauer development, we performed RNA-Seq. We  
277 compared the transcriptomes of *daf-2(e1370)* dauers and *chd-7(gk290);daf-2(e1370)* partial dauers.  
278 Differentially expressed genes (DEGs) analysis revealed that decreased expression of 28 genes and  
279 increased expression of 56 genes in the double mutants (Figure 4A and Supplemental Table 3). Among  
280 the latter group, we found *daf-9*, encoding the cytochrome p450 that integrates inputs from TGF- $\beta$  and  
281 insulin/IGF-II pathways to regulate DAF-12 activity during dauer development (49). We confirmed the  
282 increased expression of *daf-9* upon *chd-7* loss by RT-qPCR (Figure 4B). We hypothesized that *daf-9*

283 expression levels must be critical in the decision to develop as either fertile adults or to enter diapause,  
284 and therefore the increased expression of *daf-9* in the *chd-7;daf-2* double mutants may be preventing full  
285 execution of the dauer program. Consistent with this hypothesis, we found that depletion of *daf-9* in  
286 *chd7;daf-7* animals restored the dauer arrest phenotype at the non-permissive temperature of 25°C  
287 (Figure 4C). However, these animals still appeared to be detergent-sensitive partial dauers (Figure 4D),  
288 since *daf-9* itself is required for proper dauer morphogenesis (39). Thus, we posit that the inability of *chd-*  
289 *7* mutants to fully repress *daf-9* may be sufficient to activate DAF-12 and inhibit dauer formation in both  
290 the TGF-β and IIS pathways (Figure 4E).

291 The partial dauer larvae that arise from knockdown of *chd-7* are short and thick and lack dauer  
292 alae, indicative of cuticle defects (Figures 1A and 1G). Thus, we reasoned that *chd-7* might also regulate  
293 target genes that are required for dauer morphogenesis. Further analysis of our transcriptomic data  
294 showed that 10% of the DEGs were collagens (*col-103*, *col-50*, *dpy-2*, *col-184*, *col-141*, *col-142*, *col-42*  
295 and *dpy-9*), which are structural components of the cuticle. All these collagens showed increased  
296 expression in the *chd-7*-mutant dauer larvae (Figure 4A). FPKM data from Modencode libraries indicates  
297 that each of these collagens show very low expression during dauer and are expressed during various  
298 stages of reproductive development, suggesting that repression of the genes must be important for dauer  
299 development (50). Thus, our results suggest that CHD-7 is required for repression of dauer-specific  
300 collagens. These results are consistent with growing evidence that the TGF-β pathway is a major  
301 regulator of collagen deposition (35, 51). In fact, it was recently reported that two of our target genes, *col-*  
302 *141* and *col-142*, contain SMAD-binding elements (SBEs) and their expression is directly regulated by the  
303 TGF-β pathway to determine body size (52).

304 In addition to the transcriptomic analysis of dauers, we analyzed CHD-7's CHIP-seq data  
305 generated by the ModEncode project in young adults (Supplemental Table 4). Because the expression  
306 profiles of adult TGF-β and IIS mutants show significant overlap and co-regulation of many DAF-16 target  
307 genes (28), we compared this analysis with DAF-16 CHIP-seq data also from ModEncode in L4 larvae.  
308 To our surprise, we found that both transcriptional regulators share a significant number of genes  
309 (Supplemental Figure 5). Along with our observation that *chd-7* is necessary for lifespan extension of *daf-*  
310 *2* mutants, these data indicate that *chd-7* could modulate longevity by regulation of the IIS pathway,  
311 possibly through direct regulation of target genes.

312

### 313 **Chd7 regulates *col2a1* during *Xenopus* embryogenesis**

314 Type-II collagen is an extracellular matrix (ECM) protein conserved in all multicellular animals,  
315 which forms fibrils (53) and has fundamental roles in development and tissues homeostasis (54). In  
316 vertebrates, the fibrillar type-II collagen is the major structural protein of cartilage and plays a prominent  
317 role in cranial development in multiple organisms (38, 55). Collagen, type-II, alpha 1 (*Col2a1*) is the major  
318 component of the cartilage matrix having a structural function and being an important extracellular

319 signaling molecule for regulation of chondrocyte proliferation, metabolism, and differentiation (56–58).  
320 The African frog *Xenopus laevis* is a well-established model to study vertebrate facial disorders which  
321 often arise from defects in neural crest development and migration (37). In *Xenopus* embryos, prior  
322 studies established that Chd7 regulates neural crest specification and migration and its depletion  
323 recapitulates the craniofacial defects seen in CHARGE patients (36). To investigate whether Chd7 has a  
324 conserved mechanism of action and regulates collagen expression in vertebrates, we used a previously  
325 validated morpholino to induce *Xenopus* Chd7 knockdown (*chd7*-MO) (36). In *Xenopus*, *Col2a1* is  
326 essential for normal development of the skeleton and its expression is restricted to the cartilaginous  
327 skeleton of the tadpole and adult frog (59). In *chd7*-MO injected embryos, RT-qPCR revealed a significant  
328 reduction of *col2a1* mRNAs as compared to control-injected animals (Figure 5A).

329 For targeted disruption of Chd7 function, we injected the dorsal-animal (D1) blastomeres of 8-cell  
330 stage embryos fated to contribute to the dorsal anterior structures. *In situ* hybridization of unilaterally  
331 injected embryos showed alterations in *col2a1* expression in the branchial arches and/or the otic vesicle  
332 (ear vesicle) (59) upon *Chd7* depletion relative to embryos injected with a control morpholino (St-MO)  
333 (Figure 5B). The injection of *chd7*-MO into both D1 blastomeres of 8-cell stage embryos with doses  
334 between 1.25 ng and 2.5 ng showed 10-20% embryonic mortality (Figure 5C and data not shown). The  
335 higher doses of 5 ng and 10 ng led to >50% lethality (Figure 5C). We next sought to investigate if the  
336 mortality was related to collagen deficits and therefore conducted rescue experiments by co-expressing  
337 *Xenopus col2a1* mRNA with the morpholino. As shown in Figure 5C, coinjection of *col2a1* mRNA  
338 substantially improved (~50%) embryo survival relative to the injection of *chd7*-MO alone. We then asked  
339 if ectopic *col2a1* mRNAs could suppress the craniofacial defects associated with *chd7* loss-of-function.  
340 Initially, we analyzed the gross morphology of the surviving stage 45 tadpoles and observed a high  
341 incidence of craniofacial malformations (83%) in Chd7-depleted animals (Supplemental Figure 6A and  
342 6C) and a significant reduction upon *col2a1* mRNA coinjection (43%) (Supplemental Figure 6B). Next, we  
343 examined eye size and eye distance, since microphthalmia and midline defects are often associated with  
344 CHARGE syndrome (60) and are recapitulated in *Xenopus* embryos (36). Both eye size and distance  
345 between eyes were reduced in Chd7-depleted tadpoles and were partially rescued by *col2a1* mRNA  
346 expression (Figure 5D and 5E). Therefore, expression of *col2a1* ameliorated the phenotypes associated  
347 with pathogenic Chd7 suggesting that collagen is a conserved and important target of this protein.

348

## 349 **DISCUSSION**

350

351 We initially identified *chd-7* in chromatin immunoprecipitation (ChIP)-chip studies of the nuclear  
352 receptor DAF-12 (34), a transcription factor regulating worm aging, development, and dauer formation  
353 (61), and found it to be critical for *daf-2* mediated dauer development. Comparison of the *chd-7* alleles  
354 *gk290* and *gk306* showed a critical role for the BRK domain in dauer development and longevity (Figures



355 1F-H, 2A and 2C). In CHARGE patients, deletions or mutations within the BRK domains of CHD7 are  
356 sufficient to elicit all the features characteristic of the disease, underscoring the importance of this domain  
357 (62). The phenotypic differences between the worm alleles highlight the potential of the worm to delimit  
358 functional domains of CHD-7 that contribute to disease pathology. In mice, homozygous mutations in  
359 *Chd7* lead to embryonic lethality at E10.5, in part because *Chd7* is necessary for early brain development  
360 (36). In worms, the presumptive null allele *chd-7(tm6139)* and *scd-3(sa253)* were viable but showed  
361 reproductive defects, such as improper gonad proliferation and migration, reduced fecundity, male tail  
362 defects and hermaphrodite vulval defects (31), indicating that *C. elegans* are more able to tolerate loss of  
363 CHD-7 than mice or humans. Thus, our studies establish *C. elegans* as an animal model to study the  
364 mechanisms underlying the developmental defects observed in pathogenic Chd7.

365 Both a *chd-7* mutation and *chd-7* overexpression shortened the lifespan of otherwise wild-type  
366 worms, suggesting that CHD-7 proteins levels must be tightly regulated to ensure proper development. Of  
367 note, *Chd7* is the most commonly amplified gene in tumors amongst the CHD superfamily members, and  
368 its overexpression is associated with aggressive subtypes of breast cancer and poor prognosis (63).  
369 Thus, in humans, as well as worms, gain-of-function phenotypes are associated with *Chd7/chd-7*  
370 overexpression.

371 Our genetic epistasis analyses placed CHD-7 downstream of the TGF- $\beta$ -like DAF-7, the type I  
372 receptor DAF-1, and the R-SMAD DAF-14 placing CHD-7 at the level of the Co-Smad DAF-3 and the  
373 Sno/Ski repressor DAF-5, which are also *Daf-d* (64). While *daf-3* and *daf-5* completely suppress dauer  
374 formation in a *daf-7* background at 25°C, *daf-5* fails to suppress dauer formation in TGF- $\beta$  mutants at  
375 27°C (26), supporting a role for CHD-7 at the DAF-3/DAF-5 step in the pathway (Figures 3A and 3B).  
376 Interestingly, these transcriptional regulators have opposite effects on *daf-2*-induced longevity: *daf-3*  
377 enhances *daf-2(e1370)* longevity while *daf-5* mutations suppresses it (30). We observed that *chd-7*  
378 suppresses *daf-2* longevity (Figure 2C), like *daf-5(e1386)*. Together these data suggest that CHD-7 either  
379 regulates *daf-5* expression or directly interacts with DAF-5 to regulate downstream target genes, or both.  
380 In mice, CHD7 was shown to physically interact with SMAD1 and form a transcriptional complex with  
381 SMAD4, the mammalian ortholog of DAF-3 (65). We therefore speculate that DAF-3, DAF-5, and CHD-7  
382 may be in ternary complex that regulates *daf-9* expression for dauer entry (Figure 4C). Interactome  
383 mapping of the TGF- $\beta$  pathway also identified SWSN-1, a SWI/SNF subunit component of the BAF  
384 complex, as a physical interactor of DAF-3 (66). CHD7 interacts with human and *Xenopus* PBAF  
385 (polybromo- and BRG1-associated factor-containing complex) to control neural crest gene expression  
386 (36). In worms, both *swn-1* and *chd-7* fail to develop normal dauers in *daf-2* and *daf-7* mutants  
387 (Supplemental Figure 3 and (67)). Thus, we envision that CHD-7 may work together with the BAF  
388 complex and DAF-3/DAF-5 to control gene expression of target genes critical for dauer formation.

389 DAF-9 activity is necessary and sufficient for the decision to enter diapause: reduced activity of  
390 TGF- $\beta$  and IIS pathways leads to *daf-9* repression and dauer development. Conversely, *daf-9* expression

391 in the hypodermis is sufficient to inhibit diapause, driving reproductive programs in *daf-7* mutants (29, 32).  
392 Ectopic *daf-9* expression also drives reproductive programs in the weak *daf-2(e1368)* allele, but only  
393 partially suppresses *daf-2(e1370)* diapause leading to arrest as L3 or early L4 larvae (32). Based on  
394 these observations, we speculate that *daf-9* misexpression explains a subset of the *chd-7* phenotypes  
395 observed herein, including the partial dauer phenotype, gonad migration defects, and vulval protrusions,  
396 all of which overlap with published *daf-9* phenotypes (32, 33, 68). Interestingly, *daf-9* is both upstream  
397 and downstream of *daf-12* for dauer formation (32, 33). Our data demonstrated that DAF-12 regulates  
398 *chd-7* expression and CHD-7 in turn regulates *daf-9* expression. Therefore, we propose that CHD-7  
399 belongs to the transcriptional complex that regulates the feedback loop between *daf-12* and *daf-9*.

400 Among the differentially expressed genes, we noted the presence of several G protein coupled  
401 receptors (GPCRs), which could be candidate chemoreceptors for dauer pheromone or environmental  
402 cues and thus may be required for either dauer entry or maintenance (42). Consistent with our  
403 transcriptomic studies, *Liu et al.* analyzed the expression differences between L2/L3 larvae and TGF- $\beta$   
404 mutants undergoing diapause and found enrichment of collagen genes, GPCRs and *daf-9*, further  
405 validating our placement of CHD-7 in the TGF- $\beta$  dauer signaling pathway (29). In a more recent paper,  
406 also was established that GPCR gene expression increases significantly during dauer commitment (69).

407 In *C. elegans*, the TGF- $\beta$  family pathway has diversified and has unique ligands and effectors for  
408 the control of dauer induction and aspects of somatic development. Mutations in the TGF- $\beta$  ligand *dbl-1*  
409 and its downstream components cause a small body size (Sma phenotype) (47, 48). Consistent with *chd-7*  
410 being a component of the TGF- $\beta$  signaling pathway, *chd-7(gk290)* and *chd-7(tm6139)* are significantly  
411 shorter than wild-type worms (Figure 3C). This phenotype is also observed in *scd-3* mutants (31). The  
412 *dbl-1* pathway mutants have defects in male tail development (48), a phenotype shared in *scd-3* (31) and  
413 *chd-7* mutant animals (data not shown and (31)). Therefore, our results suggest that CHD-7 acts as a  
414 regulator of both the *daf-7* and *dbl-1* branches of the TGF- $\beta$  pathway.

415 Craniofacial anomalies seen in CHARGE patients involve tissues deriving from cells of the neural  
416 crest, including craniofacial cartilage and bone, heart, ears and eyes (60, 70). *Xenopus laevis* is an  
417 established model to understand fundamental questions of craniofacial biology (37). *Chd7* knockdown in  
418 frogs and in zebrafish (11, 36), leads to defects in neural crest specification and migration, which was  
419 recently been recapitulated in human embryonic stem cells (hESCs) (71). Our RNA-seq analysis revealed  
420 that CHD-7 regulates expression of genes from the cuticle, a modified extracellular matrix (72). Here, we  
421 show a role for Chd7 in regulating *col2a1* expression, a type II collagen and the major component of  
422 cartilage (55). Interestingly, regulation of *col2a1* by Chd7 is also observed in zebrafish (73). While  
423 additional studies are required, we speculate that Chd7 could regulate *col2a1* in a complex with the  
424 transcription factor Sox10 (74, 75) or through the TGF- $\beta$  signaling pathway (35, 76). Supporting the latter  
425 mechanism, it was demonstrated in chondrocytes that TGF- $\beta$  regulates *col2a1* expression (77, 78). Taken



426 together, our data supports a model in which collagen misexpression by pathogenic Chd7 leads to  
427 craniofacial defects and embryonic lethality.

428

## 429 **MATERIALS and METHODS**

430

### 431 ***C. elegans* strains**

432 All strains were grown and maintained on standard nematode growth medium (NGM). In  
433 Argentina (Hochbaum lab), plates were supplemented with 0.1 mg/ml streptomycin and 100 U/ml Nystatin  
434 using the *E. coli* OP50-1 strain as the food source. In Pittsburgh (Yanowitz lab), strains were grown on  
435 standard NGM seeded with OP50. Temperature-sensitive strains were maintained at 16°C and shifted to  
436 the non-permissive temperature of 25°C to induce dauer formation, unless otherwise indicated. All other  
437 strains were maintained at 20°C. All *daf-7* strains were maintained at low density to prevent dauer  
438 induction at 16°C. Dauer studies were performed in both the Yanowitz and Hochbaum laboratories to  
439 validate results. All *chd-7* alleles were outcrossed at least 5 times prior to use.

440 Strains utilized in this study are listed in Supplemental Table 1. Standard genetic crosses were  
441 used to make double or triple mutants. The presence of mutant alleles was confirmed a) by the *daf-c*  
442 phenotypes in animals heterozygous for additional mutations and b) by PCR and/or sequencing for all  
443 additional mutations.

444

### 445 **RNAi screen for dauer suppressors**

446 All RNAi clones were picked from the Ahringer bacterial feeding library (79). These *E. coli* clones  
447 were seeded on NGM plates supplemented with 1 mM of IPTG (Isopropyl β-D-1-thiogalactopyranoside)  
448 and 0.1 μg/ml ampicillin, and used for inducing RNAi by the feeding method (80).

449 GL228 [*rrf-3(pk1426)*] II;*daf-2(e1371)* III] eggs were placed in 24-well RNAi plates seeded with  
450 bacteria expressing the dsRNA of interest. Worms were maintained for 5 days at 15°C until adulthood,  
451 then were transferred to an identical 24-well plate to lay eggs for 5 h. Adults were removed and the eggs  
452 were incubated at 25°C for 4 days to allow formation of dauers. *daf-16(RNAi)* and the empty vector were  
453 used as controls. Proper dauer formation was assessed by observation in a dissecting microscope and by  
454 1% SDS resistance. RNAi clones that caused abnormal dauer phenotypes were validated in *daf-2(e1370)*  
455 worms. Identity of the dsRNA was confirmed by sequencing (Macrogen, Korea).

456

### 457 ***daf-9* suppression assays**

458 For preparation of *daf-9*(RNAi) plates, bacterial cultures were grown overnight in LB with 10 μg/ml  
459 tetracycline and 50 μg/ml carbenicillin and induced with 4 mM IPTG for 4 h. Cultures were spun down,  
460 suspended in 1/10 volume and 30 μl of bacteria were seeded on 3 cm NGM plates made with 1 mM IPTG

461 and 50 µg/ml carbenicillin. Plates were grown overnight at 25°C and stored at 4°C for no more than 2  
462 weeks prior to use.

463 L4 stage animals were placed on 3 cm RNAi plates. Two worms per plate were used for *daf-*  
464 *7(e1372)*, while three worms were used for *daf-7;chd-7(gk290)* and *daf-7;chd-7(tm6139)*. After 72 h, the  
465 adults were removed and plates were replaced at 25°C for 2-3 days. The total number of dauers, L4s,  
466 and adults were then assessed.

467

#### 468 **SDS survival assay**

469 Young adults were transferred to seeded plates and permitted to lay eggs for 5 days at 25°C. The  
470 arrested progeny were then washed off plates with M9 (22 mM KH<sub>2</sub>PO<sub>4</sub>, 42 mM Na<sub>2</sub>HPO<sub>4</sub>, 85.5 mM  
471 NaCl, 1 mM MgSO<sub>4</sub>) into 15 ml glass conical tubes. Collected animals were washed 2-3 times with M9  
472 and the excess liquid was aspirated off. Animals were then treated with 2 ml of 1% SDS for 30 min on a  
473 nutator at 25°C. Following incubation, the samples were washed 3 times with M9 and any excess liquid  
474 was aspirated off. Animals were aliquoted to 5 seeded plates with 50-70 worms per plate and allowed to  
475 recover at 16°C. The recovered animals were then quantified, and the percentage recovered was  
476 calculated. This was repeated 3 times for each strain tested. Comparisons were performed using the  $\chi$ -  
477 squared Test in R; P values were corrected using the Bonferroni method for multiple comparisons.

478

#### 479 ***fog-2* mating assay**

480 To determine if males were capable of siring offspring, 8 males from each strain tested were  
481 plated with 4 *fog-2(q71)* adult females on seeded 10 cm plates. After 24 h, *fog-2* females were transferred  
482 to new plates and within 48 h the proportion of fertile females were scored. Assay was repeated two  
483 times.

484

#### 485 **Lifespan assays**

486 All lifespan experiments were conducted by transferring 1 day-old adults from 15°C to 20°C for  
487 the remainder of the lifespan assay. NGM plates were seeded with *E. coli* OP50-1. ~150 L4  
488 hermaphrodites were transferred to 5 plates per experiment. Every 48 h, animals were scored as alive,  
489 dead or censored (animals that exploded, died from bagging or dried out at the edges of the plates).  
490 Animals were considered dead when they did not respond to a soft touch to the head with a pick. To  
491 prevent the progeny from interfering with the assay, adults were transferred to fresh plates every 48 h  
492 until egg production ceased. For *glp-1(e2144)* assays, eggs were kept at 20°C for 4 h and then  
493 transferred at 25.5°C for 72 h to induce sterility and switched to 20°C for the remainder of the experiment.  
494 Lifespan data were analyzed using the Kaplan-Meier method. Statistics were calculated using the Mantel-  
495 Cox nonparametric log-rank method using OASIS2 (81).

496

497 **Pathogen resistance assay**

498 The pathogenic bacterial strain used in this study was *Pseudomonas aeruginosa* (strain PA14).  
499 This strain was streaked from a frozen stock onto an LB agar plate, incubated at 37°C overnight and then  
500 kept at 4°C (shelf-life of one week). For survival assay, a single PA14 colony was inoculated in King's  
501 broth and incubated at 37°C overnight with shaking. 20 µl of this culture was seeded onto slow killing  
502 NGM plates (containing 0.35% peptone instead of 0.25%) and incubated for 24 h at 37°C. The plates  
503 were then left to sit at room temperature for 24 h. The following day, 150 L4 hermaphrodites grown at  
504 15°C were distributed onto five PA14 plates and incubated at 25°C. Survival was monitored at intervals of  
505 6-12 h and live, dead and censored animals were recorded. Data and statistics were analyzed using the  
506 Kaplan-Meier method as described in the section "Lifespan assays".

507

508 **Microscopy and fluorescence imaging**

509 For imaging dauers and adults, worms were immobilized in a 25 mM sodium azide solution on  
510 fresh 4% agarose pads and imaged at 10x and 20x magnification. Images were collected using a Zeiss  
511 Axioplan Imaging Microscope with a DIC system and Zeiss Plan-Neofluar 10x and 20x objectives lens.  
512 Images were acquired with a Micropublisher 3.3 camera (Q Imaging). ImageJ (NIH) software was used to  
513 quantify worm size.

514 For imaging *pCHD-7::mCherry* fluorescence, worms were immobilized with 1 mM levamisole on  
515 fresh 2% agarose pads and imaged immediately using a Nikon A1r confocal microscope equipped with a  
516 40x PLAN APO oil objective. ImageJ (NIH) software was used to quantify fluorescence intensity.

517 For imaging gonads in *daf-2(e1370)* and mutants, young adults were transferred to seeded plates  
518 and permitted to lay eggs for 5 days at 25°C to form dauers, then collected and fixed with Carnoy's  
519 solution (75 µl EtOH, 37.5 µl Acetate, 12.5 µl Chloroform) and stained with 5 mg/ml DAPI (4',6-diamidino-  
520 2-phenylindole) in PBS. Animals were imaged as 0.5 µm Z-stacks with the Nikon A1r Confocal  
521 Microscope with 40x and 60x plan APO oil objectives.

522 For imaging *ajm-1::GFP*, young adults were transferred to seeded plates and allowed to lay eggs  
523 for 5 days at 25°C to form dauers. The arrested progeny was then washed off plates with M9 into 15 ml  
524 glass conical tubes. Collected animals were washed 2-3 times with M9 and the excess liquid was  
525 aspirated off. Animals were then immobilized with levamisole and the seam cells were imaged as Z-  
526 stacks by confocal microscopy as described immediately above.

527 For scanning electron microscopy, worms were fixed by immersing in 2.5% glutaraldehyde in  
528 PBS for several hours. Worms were washed 3X in PBS then post fixed in aqueous OsO<sub>4</sub> for 1h, then  
529 washed 3x in PBS, dehydrated through a graded series of ethanols (30-100%) then chemically dried with  
530 2x 10 min incubations in hexamethyldisilazane. Dried worms were sprinkled onto copper double stick  
531 tape on aluminum stubs, sputter coated with 3.5 nm gold-palladium alloy then evaluated on a JEOL JEM  
532 6335F microscope at 5 kV.

533

#### 534 **Library preparation and RNA-seq**

535 *daf-2(e1370)* and *chd-7(gk290);daf-2(e1370)*, synchronized eggs were kept at 25°C for 10 days  
536 and resulting dauers were collected and frozen. Total RNA was extracted with TRIzol (Invitrogen)  
537 following the kit's protocol. cDNA library was prepared with NEBNext Ultra II RNA library prep kit for  
538 Illumina (New England Biolabs), and the sequencing carried out using Illumina's HiSeq-2500 sequencer  
539 with single-end mode and read length of 50 bp. Five replicates for *daf-2(e1370)* vs. *chd-7(gk290);daf-*  
540 *2(e1370)* were sequenced. For data assessment, a quality control with FastQC software (version 0.11.5)  
541 was used. First the raw reads that aligned against the *E. coli* genome (K12 genome) were removed. The  
542 remaining sequences were aligned against the reference genome of *C. elegans* WS260 using STAR  
543 (version 2.5.4a). The number of mapped reads to genes was counted using Htseq (version 0.9.1). Finally,  
544 the DEGs were determined using DESeq2 (version 1.20.0) with a cutoff of 0.05 on False Discovery Rate  
545 (FDR). R version 3.5.0 (2018-04-23) and Bioconductor version 3.7 with BiocInstaller version 1.30.0 were  
546 used. Heatmaps were generated using pheatmap package (version 1.0.12) with hierarchical clustering  
547 on the rows with the default options.

548

#### 549 **Genomic Sequencing of *scd-3***

550 A 6 cm plate replete with *scd-3* gravid animals was washed with 1 ml M9 and collected in a glass  
551 conical tube. Worms were washed extensively and then placed on a nutator for 1 h to allow remaining gut  
552 bacteria to be passed into the medium. Worms were again washed 3-4 times and settled by gravity. The  
553 worm pellet was transferred to 1.5 ml tubes and genomic DNA was prepared according to the  
554 manufacturer's protocol with the Purelink Genomic DNA Kit (Invitrogen) except that after addition of  
555 digestion buffer, worms were pulverized with a microfuge hand dounce prior to incubation at 55°C.  
556 Sequencing was performed by Psomagen, Qiagen CLC Genomics Workbench was used to align the  
557 DNA against WBcel235 and view the variant.

558

#### 559 **Oil-Red-O (ORO) staining**

560 Dauers grown at 25°C for 5 days were stained for lipids using ORO, as previously described (82).  
561 Animals were mounted on a 4% agarose pad and observed in a Zeiss Axioplan brightfield microscope  
562 equipped with a Micropublisher 3.3 camera (Q Imaging). Image J (NIH) was used to quantify the amount  
563 of lipids in each animal. At least 20 animals of each strain were quantified. Statistical differences was  
564 determined by Student's t-test.

565

#### 566 **L1 survival**

567 Experiments were done at 20°C. Eggs were obtained by bleaching of gravid adults and kept  
568 under gentle shaking in 5ml sterile M9 supplemented with 0.1µg/ml streptomycin to hatch (16h). To

569 normalize population density, resulting L1 larvae were diluted to obtain 1 larva/ $\mu$ l in 5ml of M9 and kept  
570 under constant agitation for the remainder of the experiment. Every 48h, a 100 $\mu$ l aliquot of L1 larvae were  
571 spotted onto a NGM plate and then incubated for 72h. Animals were scored as alive if developed beyond  
572 the L2 stage. Percentage of the population alive was normalized to day 1 seeded L1 larvae.

573

#### 574 **Gonad staining**

575 Late L4/Young Adult animals from the relevant strains were collected and fixed with Carnoy's  
576 solution (75  $\mu$ l EtOH, 37.5  $\mu$ l Acetate, 12.5  $\mu$ l Chloroform) and stained with 5 mg/ml DAPI (4',6-diamidino-  
577 2-phenylindole) in PBS. Animals were imaged as 0.5  $\mu$ m Z-stacks with the Nikon A1r Confocal  
578 Microscope with 20x objective.

579

#### 580 **ChIP-seq analysis**

581 Data from CHD-7 and DAF-16 ChIP-seq generated by ModEncode project was analyzed.  
582 Reference for CHD-7-eGFP: <https://www.encodeproject.org/experiments/ENCSR010MNU/>. Reference for  
583 DAF-16-eGFP: <https://www.encodeproject.org/experiments/ENCSR946AUJ/>. Peaks were downloaded in  
584 ce10 and annotated using Homer software. Gene lists from the peak calling were generated and used to  
585 compare CHD-7 and DAF-16.

586

#### 587 ***Xenopus laevis* embryo manipulation and microinjections**

588 *Xenopus* embryos were obtained by natural mating. Adult frogs' reproductive behavior was  
589 induced by injection of human chorionic gonadotropin hormone. Eggs were collected, de-jellied in 3%  
590 cysteine (pH 8.0), maintained in 0.1 X Marc's Modified Ringer's (MMR) solution and staged according to  
591 Nieuwkoop and Faber (83). The embryos were placed in 3% ficoll prepared in 1 X MMR for  
592 microinjection. *Chd7* morpholino (*chd7*-MO: 5'-AACTCATCATGCCAGGGTCTGCCAT-3') specificity has  
593 been previously characterized (36). *Chd7*-MO and Standard Control morpholino (St-MO) were provided  
594 by Gene Tools, LLC. The cDNA of *X. laevis col2a1* was amplified by PCR from pCMV-Sport 6-*col2a1*  
595 (Dharmacon) with primers M13F and M13R. The PCR fragment was digested with *EcoRV* and *NotI* and  
596 cloned into pCS2+ previously digested with *StuI* and *NotI*. Capped mRNAs for *col2a1* were transcribed *in*  
597 *vitro* with SP6 using the mMessage mMachine kit (Ambion) following linearization with *NotI*. *Chd7*-MO  
598 and *col2a1* mRNA were injected into both D1 blastomeres of 8-cell staged embryos (82) for lethality and  
599 morphometrics analysis. *Chd7*-MO was injected into one D1 blastomeres of 8-cell staged embryos for  
600 analysis of *col2a1* expression.

601

602 Whole-mount *in situ* hybridization was carried out as previously described (85). pCMV-Sport 6-  
603 *col2a1* (Dharmacon) construct was linearized with *SaII* and transcribed with T7 for antisense probe  
604 synthesis. Morphometrics analyses were done on fixed tadpoles using ImageJ (NIH) software.

604

Morphometric measurements were normalized to the mean of the uninjected group in order to compare

605 between independent experiments. For cartilage staining, stage 45 tadpoles were fixed with MEMFA for  
606 24 hours at 4°C, dehydrated into 100% ethanol and stained in 0.01% Alcian blue 8GX in 70%  
607 ethanol/30% glacial acetic acid for three nights. Distaining was done in 100% ethanol followed by  
608 rehydration in 2% KOH. Animals were cleared in graded glycerol in 2% KOH and skulls were dissected  
609 under stereoscope. Images of whole embryos and skulls were collected with a Leica DFC420 camera  
610 attached to a Leica L2 stereoscope.

611

### 612 **RNA preparation and RT-qPCR**

613 For *Xenopus* RNA extraction, 2-cell staged embryos were injected into both blastomeres with 5  
614 ng or 10 ng of *chd7*-MO, collected at stage 23 and snap-frozen for later processing. Six embryos were  
615 combined for each treatment. For worm RNA extraction, dauers and partial dauers were developed for a  
616 week at 25°C. For all the samples, RNA was isolated using RNAzol (Molecular Research). RNA  
617 concentration of each sample was measured using a Nanodrop spectrophotometer and 250 ng of RNA  
618 was reverse transcribed using qScript cDNA SuperMix (QuantaBio). Quantitative PCR (qPCR) was  
619 preformed using the Forget-Me-Not qPCR Master Mix (Biotium) with a BioRad iCycler thermocycler.  
620 Amplification was performed using oligonucleotides designed with PerlPrimer software for *col2a1*  
621 (Forward 5' TCCCTGTTGATGTTGAAGCC 3'; Reverse 5' CAATAGTCACCGCTCTTCCA 3' and ODC  
622 primers have been previously described (86) (Forward 5' CAAAGCTTGTTCTACGCATAGCA 3'; Reverse  
623 5' GGTGGCACCAAATTTCACT 3'). The relative expression of *col2a1* was normalized  
624 to *ODC* expression and determined via the method previously described (87). *daf-9* was amplified with  
625 specific oligos (Forward 5' ATTCCCACAAAACAATCGAAGAAT 3'; Reverse 5'  
626 GAGATTCAAACACGTTTGGATCG 3') and expression was normalized to the housekeeping gene *cdc-42*  
627 (Forward 5' CTGCTGGACAGGAAGATTACG 3'; Reverse 5' CTGGGACATTCTCGAATGAAG 3').

628

### 629 **Ethics Statement**

630 *Xenopus laevis* experiments were carried out in strict accordance with the recommendations in  
631 the Guide for the Care and Use of Laboratory Animals of the NIH and also the ARRIVE guidelines. The  
632 animal care protocol was approved by the Comisión Institucional para el Cuidado y Uso de Animales de  
633 Laboratorio (CICUAL) of the School of Applied and Natural Sciences, University of Buenos Aires,  
634 Argentina (Protocol #64).

635

### 636 **ACKNOWLEDGMENTS**

637 The authors would like to thank Bruno Moretti, Hernan Grecco, Mario Rossi, and Julie Kocherzat  
638 for experimental support. DMJ and ASC were supported by the Consejo Nacional de Investigaciones  
639 Científicas y Técnicas (CONICET) Doctoral Fellowship Program. DH laboratory was supported by the  
640 Agencia Nacional de Promoción Científica y Tecnológica of Argentina (PICT-2016-0269) and CONICET



641 (PIP 1122015 0100731 CO). MCC laboratory was supported by the Agencia Nacional de Promoción  
642 Científica y Tecnológica of Argentina (PICT-2013-0381). Funding for this work was also provided by  
643 grants from the CHARGE Syndrome Foundation (JLY and DH), The Company of Biologists (DMJ),  
644 NIGMS (R01GM104007 to JLY), and NIA (R01AG051659 to AG). This work was supported in part by the  
645 Intramural Research Program of the NIH and the National Institute of Diabetes and Digestive and Kidney  
646 Diseases (SY).

647

## 648 REFERENCES

649

- 650 1. L. E. L. M. Vissers, *et al.*, Mutations in a new member of the chromodomain gene family cause  
651 CHARGE syndrome. *Nature genetics* **36**, 955–7 (2004).
- 652 2. R. Balasubramanian, *et al.*, Functionally compromised CHD7 alleles in patients with isolated  
653 GnRH deficiency. *Proc Natl Acad Sci U S A* **111**, 17953–17958 (2014).
- 654 3. H.-G. Kim, *et al.*, Mutations in CHD7, encoding a chromatin-remodeling protein, cause idiopathic  
655 hypogonadotropic hypogonadism and Kallmann syndrome. *Am. J. Hum. Genet.* **83**, 511–519 (2008).
- 656 4. R. Bernier, *et al.*, Disruptive CHD8 Mutations Define a Subtype of Autism Early in Development.  
657 *Cell* **158**, 263–276 (2014).
- 658 5. C. G. A. Marfella, A. N. Imbalzano, The Chd family of chromatin remodelers. *Mutation research*  
659 **618**, 30–40 (2007).
- 660 6. S. A. Patten, *et al.*, Role of Chd7 in Zebrafish: A Model for CHARGE Syndrome. *PLoS One* **7**  
661 (2012).
- 662 7. E. A. Bosman, *et al.*, Multiple mutations in mouse Chd7 provide models for CHARGE syndrome.  
663 *Hum Mol Genet* **14**, 3463–3476 (2005).
- 664 8. C. Tian, *et al.*, Otitis media in a new mouse model for CHARGE syndrome with a deletion in the  
665 Chd7 gene. *PLoS one* **7**, e34944 (2012).
- 666 9. G. Daubresse, *et al.*, The Drosophila kismet gene is related to chromatin-remodeling factors and  
667 is required for both segmentation and segment identity. *Development* **126**, 1175–1187 (1999).
- 668 10. D. J. Melicharek, L. C. Ramirez, S. Singh, R. Thompson, D. R. Marena, Kismet/CHD7 regulates  
669 axon morphology, memory and locomotion in a Drosophila model of CHARGE syndrome. *Hum Mol Genet*  
670 **19**, 4253–4264 (2010).
- 671 11. Z. Asad, *et al.*, Rescue of neural crest-derived phenotypes in a zebrafish CHARGE model by  
672 Sox10 downregulation. *Hum Mol Genet* **25**, 3539–3554 (2016).
- 673 12. T. A. McDiarmid, *et al.*, Systematic phenomics analysis of autism-associated genes reveals  
674 parallel networks underlying reversible impairments in habituation. *PNAS* **117**, 656–667 (2020).
- 675 13. W.-R. Wong, *et al.*, Autism-associated missense genetic variants impact locomotion and  
676 neurodevelopment in *Caenorhabditis elegans*. *Hum Mol Genet* **28**, 2271–2281 (2019).

- 677 14. C. Kenyon, J. Chang, E. Gensch, A. Rudner, R. Tabtiang, A C. elegans mutant that lives twice as  
678 long as wild type. *Nature* **366**, 461–464 (1993).
- 679 15. P. L. Larsen, Aging and resistance to oxidative damage in *Caenorhabditis elegans*. *Proc Natl*  
680 *Acad Sci U S A* **90**, 8905–8909 (1993).
- 681 16. M. M. Gaglia, C. Kenyon, Stimulation of Movement in a Quiescent, Hibernation-Like Form of  
682 *Caenorhabditis elegans* by Dopamine Signaling. *J Neurosci* **29**, 7302–7314 (2009).
- 683 17. J. Wang, S. K. Kim, Global analysis of dauer gene expression in *Caenorhabditis elegans*.  
684 *Development* **130**, 1621–1634 (2003).
- 685 18. E. Cohen, J. Bieschke, R. M. Perciavalle, J. W. Kelly, A. Dillin, Opposing activities protect against  
686 age-onset proteotoxicity. *Science* **313**, 1604–1610 (2006).
- 687 19. A. Meléndez, *et al.*, Autophagy genes are essential for dauer development and life-span  
688 extension in *C. elegans*. *Science* **301**, 1387–1391 (2003).
- 689 20. R. Christensen, L. de la Torre-Ubieta, A. Bonni, D. A. Colón-Ramos, A conserved PTEN/FOXO  
690 pathway regulates neuronal morphology during *C. elegans* development. *Development* **138**, 5257–5267  
691 (2011).
- 692 21. C. A. Wolkow, K. D. Kimura, M.-S. Lee, G. Ruvkun, Regulation of *C. elegans* Life-Span by  
693 Insulinlike Signaling in the Nervous System. *Science* **290**, 147–150 (2000).
- 694 22. R. C. Cassada, R. L. Russell, The dauerlarva, a post-embryonic developmental variant of the  
695 nematode *Caenorhabditis elegans*. *Dev Biol* **46**, 326–342 (1975).
- 696 23. D. L. Riddle, P. S. Albert, “Genetic and Environmental Regulation of Dauer Larva Development”  
697 in *C. Elegans II*, 2nd Ed., D. L. Riddle, T. Blumenthal, B. J. Meyer, J. R. Priess, Eds. (Cold Spring Harbor  
698 Laboratory Press, 1997) (September 25, 2017).
- 699 24. P. Ren, *et al.*, Control of *C. elegans* larval development by neuronal expression of a TGF-beta  
700 homolog. *Science* **274**, 1389–1391 (1996).
- 701 25. D. Park, A. Estevez, D. L. Riddle, Antagonistic Smad transcription factors control the dauer/non-  
702 dauer switch in *C. elegans*. *Development* **137**, 477–485 (2010).
- 703 26. L. S. da Graca, DAF-5 is a Ski oncoprotein homolog that functions in a neuronal TGF pathway to  
704 regulate *C. elegans* dauer development. *Development* **131**, 435–446 (2003).
- 705 27. J. H. Thomas, D. A. Birnby, J. J. Vowels, Evidence for parallel processing of sensory information  
706 controlling dauer formation in *Caenorhabditis elegans*. *Genetics* **134**, 1105–1117 (1993).
- 707 28. W. M. Shaw, S. Luo, J. Landis, J. Ashraf, C. T. Murphy, The *C. elegans* TGF- $\beta$  Dauer Pathway  
708 Regulates Longevity via Insulin Signaling. *Current Biology* **17**, 1635–1645 (2007).
- 709 29. T. Liu, K. K. Zimmerman, G. I. Patterson, Regulation of signaling genes by TGFbeta during entry  
710 into dauer diapause in *C. elegans*. *BMC Dev Biol* **4**, 11 (2004).
- 711 30. S. D. Narasimhan, *et al.*, PDP-1 Links the TGF- $\beta$  and IIS Pathways to Regulate Longevity,  
712 Development, and Metabolism. *PLoS Genet* **7** (2011).



- 713 31. T. Inoue, J. H. Thomas, Suppressors of transforming growth factor-beta pathway mutants in the  
714 *Caenorhabditis elegans* dauer formation pathway. *Genetics* **156**, 1035–1046 (2000).
- 715 32. B. Gerisch, A. Antebi, Hormonal signals produced by DAF-9/cytochrome P450 regulate *C.*  
716 *elegans* dauer diapause in response to environmental cues. *Development* **131**, 1765–1776 (2004).
- 717 33. H. Y. Mak, G. Ruvkun, Intercellular signaling of reproductive development by the *C. elegans* DAF-  
718 9 cytochrome P450. *Development* **131**, 1777–1786 (2004).
- 719 34. D. Hochbaum, *et al.*, DAF-12 regulates a connected network of genes to ensure robust  
720 developmental decisions. *PLoS Genet* **7**, e1002179 (2011).
- 721 35. R. A. Ignatz, J. Massagué, Transforming growth factor-beta stimulates the expression of  
722 fibronectin and collagen and their incorporation into the extracellular matrix. *J. Biol. Chem.* **261**, 4337–  
723 4345 (1986).
- 724 36. R. Bajpai, *et al.*, CHD7 cooperates with PBAF to control multipotent neural crest formation.  
725 *Nature* **463**, 958–962 (2010).
- 726 37. A. Dubey, J.-P. Saint-Jeannet, Modeling Human Craniofacial Disorders in *Xenopus*. *Curr*  
727 *Pathobiol Rep* **5**, 79–92 (2017).
- 728 38. D. W. Seufert, J. Hanken, M. W. Klymkowsky, Type II collagen distribution during cranial  
729 development in *Xenopus laevis*. *Anat. Embryol.* **189**, 81–89 (1994).
- 730 39. P. S. Albert, D. L. Riddle, Mutants of *Caenorhabditis elegans* that form dauer-like larvae. *Dev Biol*  
731 **126**, 270–293 (1988).
- 732 40. E. S. Haag, Dial-a-mutant: web-based knockout collections for model organisms. *Biol. Cell* **99**,  
733 343–347 (2007).
- 734 41. P. Narbonne, R. Roy, *Caenorhabditis elegans* dauers need LKB1/AMPK to ration lipid reserves  
735 and ensure long-term survival. *Nature* **457**, 210–214 (2009).
- 736 42. P. Kadekar, R. Roy, AMPK regulates germline stem cell quiescence and integrity through an  
737 endogenous small RNA pathway. *PLoS Biol* **17** (2019).
- 738 43. H. Hsin, C. Kenyon, Signals from the reproductive system regulate the lifespan of *C. elegans*.  
739 *Nature* **399**, 362–366 (1999).
- 740 44. D. A. Garsin, *et al.*, Long-lived *C. elegans* *daf-2* mutants are resistant to bacterial pathogens.  
741 *Science* **300**, 1921 (2003).
- 742 45. I. Lee, A. Hendrix, J. Kim, J. Yoshimoto, Y.-J. You, Metabolic rate regulates L1 longevity in *C.*  
743 *elegans*. *PLoS One* **7**, e44720 (2012).
- 744 46. M. Ailion, J. H. Thomas, Dauer Formation Induced by High Temperatures in *Caenorhabditis*  
745 *elegans*. *Genetics* **156**, 1047–1067 (2000).
- 746 47. C. Savage, *et al.*, *Caenorhabditis elegans* genes *sma-2*, *sma-3*, and *sma-4* define a conserved  
747 family of transforming growth factor beta pathway components. *Proc Natl Acad Sci U S A* **93**, 790–794  
748 (1996).

- 749 48. Y. Suzuki, *et al.*, A BMP homolog acts as a dose-dependent regulator of body size and male tail  
750 patterning in *Caenorhabditis elegans*. *Development* **126**, 241–250 (1999).
- 751 49. B. Gerisch, C. Weitzel, C. Kober-Eisermann, V. Rottiers, A. Antebi, A hormonal signaling pathway  
752 influencing *C. elegans* metabolism, reproductive development, and life span. *Dev Cell* **1**, 841–851 (2001).
- 753 50. M. B. Gerstein, *et al.*, Integrative analysis of the *Caenorhabditis elegans* genome by the  
754 modENCODE project. *Science* **330**, 1775–1787 (2010).
- 755 51. N. A. Noble, J. R. Harper, W. A. Border, In vivo interactions of TGF-beta and extracellular matrix.  
756 *Prog Growth Factor Res* **4**, 369–382 (1992).
- 757 52. U. Madaan, *et al.*, BMP Signaling Determines Body Size via Transcriptional Regulation of  
758 Collagen Genes in *Caenorhabditis elegans*. *Genetics* **210**, 1355–1367 (2018).
- 759 53. R. P. Boot-Handford, D. S. Tuckwell, Fibrillar collagen: the key to vertebrate evolution? A tale of  
760 molecular incest. *Bioessays* **25**, 142–151 (2003).
- 761 54. W. R. Wilcox, Connective Tissue and Its Heritable Disorders: Molecular, Genetic, and Medical  
762 Aspects. *Am J Hum Genet* **72**, 503–504 (2003).
- 763 55. A. Wood, D. E. Ashhurst, A. Corbett, P. Thorogood, The transient expression of type II collagen  
764 at tissue interfaces during mammalian craniofacial development. *Development* **111**, 955–968 (1991).
- 765 56. N. Garamszegi, *et al.*, Extracellular matrix-induced transforming growth factor-beta receptor  
766 signaling dynamics. *Oncogene* **29**, 2368–2380 (2010).
- 767 57. W. Xin, J. Heilig, M. Paulsson, F. Zaucke, Collagen II regulates chondrocyte integrin expression  
768 profile and differentiation. *Connect Tissue Res* **56**, 307–314 (2015).
- 769 58. L.-H. Chiu, *et al.*, Differential effect of ECM molecules on re-expression of cartilaginous markers  
770 in near quiescent human chondrocytes. *J Cell Physiol* **226**, 1981–1988 (2011).
- 771 59. R. Kerney, B. K. Hall, J. Hanken, Regulatory elements of *Xenopus col2a1* drive cartilaginous  
772 gene expression in transgenic frogs. *Int J Dev Biol* **54**, 141–150 (2010).
- 773 60. J. R. Siebert, J. M. Graham, C. MacDonald, Pathologic features of the CHARGE association:  
774 Support for involvement of the neural crest. *Teratology* **31**, 331–336 (1985).
- 775 61. A. Antebi, W. H. Yeh, D. Tait, E. M. Hedgecock, D. L. Riddle, *daf-12* encodes a nuclear receptor  
776 that regulates the dauer diapause and developmental age in *C. elegans*. *Genes Dev* **14**, 1512–1527  
777 (2000).
- 778 62. C. L. Hale, A. N. Niederriter, G. E. Green, D. M. Martin, Atypical phenotypes associated with  
779 pathogenic CHD7 variants and a proposal for broadening CHARGE syndrome clinical diagnostic criteria.  
780 *Am. J. Med. Genet. A* **170**, 344–354 (2016).
- 781 63. X. Chu, *et al.*, Genotranscriptomic meta-analysis of the CHD family chromatin remodelers in  
782 human cancers – initial evidence of an oncogenic role for CHD7. *Mol Oncol* **11**, 1348–1360 (2017).
- 783 64. M. Murakami, M. Koga, Y. Ohshima, DAF-7/TGF- $\beta$  expression required for the normal larval  
784 development in *C. elegans* is controlled by a presumed guanylyl cyclase DAF-11. *Mechanisms of*

- 785 *Development* **109**, 27–35 (2001).
- 786 65. Y. Liu, *et al.*, CHD7 interacts with BMP R-SMADs to epigenetically regulate cardiogenesis in  
787 mice. *Human Molecular Genetics* **23**, 2145–2156 (2014).
- 788 66. M. Tewari, *et al.*, Systematic Interactome Mapping and Genetic Perturbation Analysis of a *C.*  
789 *elegans* TGF- $\beta$  Signaling Network. *Molecular Cell*, **14**.
- 790 67. C. G. Riedel, *et al.*, DAF-16 employs the chromatin remodeller SWI/SNF to promote stress  
791 resistance and longevity. *Nat. Cell Biol.* **15**, 491–501 (2013).
- 792 68. K. Jia, P. S. Albert, D. L. Riddle, DAF-9, a cytochrome P450 regulating *C. elegans* larval  
793 development and adult longevity. *Development* **129**, 221–231 (2002).
- 794 69. J. S. Lee, *et al.*, FMRFamide-like peptides expand the behavioral repertoire of a densely  
795 connected nervous system. *PNAS* **114**, E10726–E10735 (2017).
- 796 70. X. Huang, J.-P. Saint-Jeannet, Induction of the neural crest and the opportunities of life on the  
797 edge. *Developmental Biology* **275**, 1–11 (2004).
- 798 71. H. Okuno, *et al.*, CHARGE syndrome modeling using patient-iPSCs reveals defective migration of  
799 neural crest cells harboring CHD7 mutations. *Elife* **6** (2017).
- 800 72. J. M. Kramer, “Extracellular Matrix” in *C. Elegans II*, 2nd Ed., D. L. Riddle, T. Blumenthal, B. J.  
801 Meyer, J. R. Priess, Eds. (Cold Spring Harbor Laboratory Press, 1997) (March 22, 2021).
- 802 73. M. Breuer, M. Rummler, C. Zaouter, B. M. Willie, S. A. Patten, Abnormal craniofacial and spinal  
803 bone development with col2a1a depletion in a zebrafish model of CHARGE syndrome. *bioRxiv*,  
804 2020.07.10.197533 (2020).
- 805 74. T. Suzuki, D. Sakai, N. Osumi, H. Wada, Y. Wakamatsu, Sox genes regulate type 2 collagen  
806 expression in avian neural crest cells. *Dev Growth Differ* **48**, 477–486 (2006).
- 807 75. D. He, *et al.*, Chd7 cooperates with Sox10 and regulates the onset of CNS myelination and  
808 remyelination. *Nature Neuroscience* **19**, 678–689 (2016).
- 809 76. A. B. Roberts, B. K. McCune, M. B. Sporn, TGF- $\beta$ : Regulation of extracellular matrix. *Kidney*  
810 *International* **41**, 557–559 (1992).
- 811 77. A. Tekari, R. Luginbuehl, W. Hofstetter, R. J. Egli, Transforming Growth Factor Beta Signaling Is  
812 Essential for the Autonomous Formation of Cartilage-Like Tissue by Expanded Chondrocytes. *PLOS*  
813 *ONE* **10**, e0120857 (2015).
- 814 78. C. Chadjichristos, *et al.*, Down-regulation of human type II collagen gene expression by  
815 transforming growth factor-beta 1 (TGF-beta 1) in articular chondrocytes involves SP3/SP1 ratio. *J Biol*  
816 *Chem* **277**, 43903–43917 (2002).
- 817 79. R. S. Kamath, J. Ahringer, Genome-wide RNAi screening in *Caenorhabditis elegans*. *Methods*  
818 **30**, 313–321 (2003).
- 819 80. L. Timmons, D. L. Court, A. Fire, Ingestion of bacterially expressed dsRNAs can produce specific  
820 and potent genetic interference in *Caenorhabditis elegans*. *Gene* **263**, 103–112 (2001).

- 821 81. S. K. Han, *et al.*, OASIS 2: Online application for survival analysis 2 with features for the analysis  
822 of maximal lifespan and healthspan in aging research. *Oncotarget* **7**, 56147–56152 (2016).
- 823 82. R. Ratnappan, *et al.*, Germline Signals Deploy NHR-49 to Modulate Fatty-Acid  $\beta$ -Oxidation and  
824 Desaturation in Somatic Tissues of *C. elegans*. *PLoS Genetics* **10** (2014).
- 825 83. Nieuwkoop, P.D., Faber, J., *Normal Table of Xenopus Laevis (Daudin) | Taylor & Francis Group*  
826 (Garland Publishing, 1994).
- 827 84. S. Huang, K. E. Johnson, H. Z. Wang, Blastomeres show differential fate changes in 8-cell  
828 *Xenopus laevis* embryos that are rotated 90 degrees before first cleavage. *Dev Growth Differ* **40**, 189–  
829 198 (1998).
- 830 85. V. Gawantka, *et al.*, Gene expression screening in *Xenopus* identifies molecular pathways,  
831 predicts gene function and provides a global view of embryonic patterning. *Mechanisms of Development*  
832 **77**, 95–141 (1998).
- 833 86. Q. Cao, Y. Shen, W. Zheng, H. Liu, C. Liu, Tcf7l1 promotes transcription of Kruppel-like factor 4  
834 during *Xenopus* embryogenesis. *J Biomed Res* **32**, 215–221 (2018).
- 835 87. M. W. Pfaffl, A new mathematical model for relative quantification in real-time RT-PCR. *Nucleic*  
836 *Acids Res* **29**, e45 (2001).
- 837

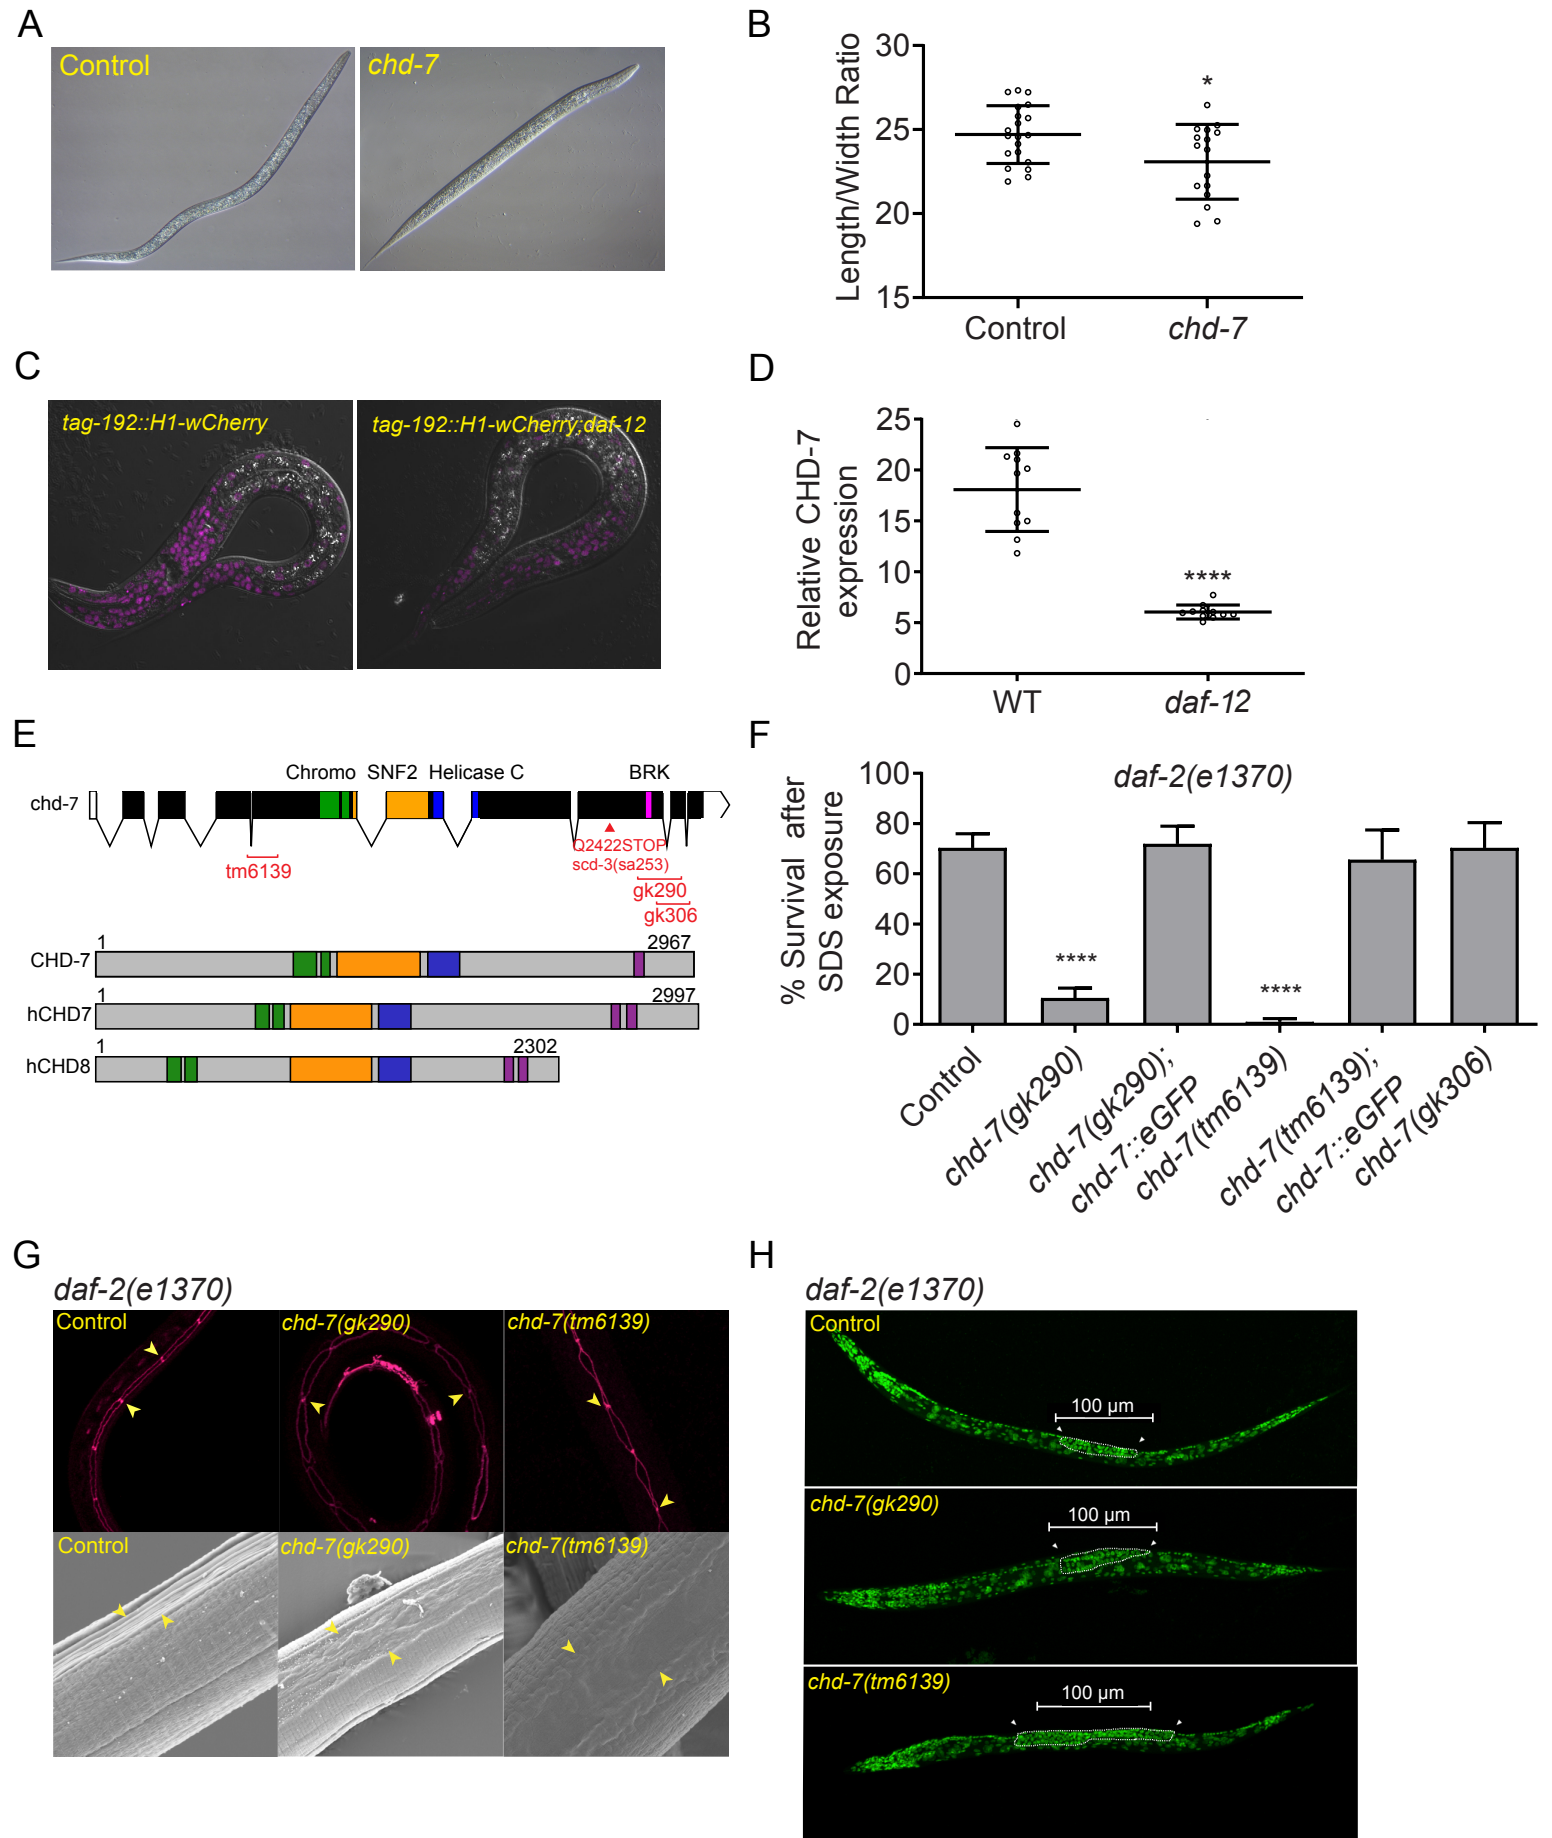

838 **Figure 1: The DAF-12 regulated target *chd-7* is required for proper dauer morphogenesis**

839

840 A) *chd-7(RNAi)* causes a partial dauer phenotype in *daf-2(e1370)*. Representative DIC photomicrographs  
841 of normal and partial dauers from *daf-2(e1370)* exposed to Control (L4440) or *chd-7* dsRNA, respectively.

842 B) Quantification of axial ratio of *daf-2(e1370);Control(RNAi)* and *daf-2(e1370);chd-7(RNAi)* dauers.

843 Three biological replicates were scored (n=16-21/replicate). Horizontal black lines represent mean with  
844 SD. Unpaired t test, \*p<0.05.

845 C) *daf-12* regulates *chd-7* expression. Representative images of *chd-7* transcriptional reporter, *tag-*  
846 *192::H1-wCherry* or *tag-192::H1-wCherry;daf-12(rh61rh411)* worms at L2/L3 stage.

847 D) Relative expression of the translational reporter (n>10/strain). Unpaired t test, \*\*\*\*p<0.0001.

848 E) *C. elegans chd-7* gene and protein. Top: *chd-7* genomic region. UTR and exons shown as bars;  
849 introns by lines. In red, available *chd-7* deletional alleles (data obtained from CGC and NBRP). Bottom

850 images depict the predicted protein isoforms of *C. elegans* CHD-7, human CHD7 and human CHD8.

851 Signature domains in CHD proteins: two N-terminal chromodomains for interaction with a variety of  
852 chromatin components (green), a SNF-2 like domain with ATPase activity (yellow) and a Helicase domain  
853 (blue). The Class III subfamily is defined by a BRK domain (purple).

854 F) *chd-7(gk290);daf-2(e1370)* and *chd-7(tm6139);daf-2(e1370)* develop as SDS-sensitive dauer larvae.

855 n>725 animals/strain tested. Bars and horizontal black lines represent mean percentage with SD. Chi-  
856 squared test with Bonferroni correction for multiple comparisons. \*\*\*\*p<0.0001. \* represents the

857 comparison to the *daf-2(e1370)* strain

858 G) *chd-7* partial dauers fail to develop the dauer alae. Top row, representative photomicrographs of *daf-*  
859 *2(e1370)* dauers or *chd-7;daf-2(e1370)* partial dauers expressing the *ajm-1::GFP* reporter to delineate the

860 seam cell borders (arrowheads mark a subset of junctions). Bottom row, SEM images of *daf-2(e1370)*  
861 dauers or *chd-7;daf-2(e1370)* partial dauers (arrowheads mark alae details).

862 H) Germ cells in *chd-7;daf-2(e1370)* mutants overproliferate and arrest as L3-like germ cells.

863 Representative Z-projections *daf-2(e1370)* dauers or *chd-7;daf-2(e1370)* partial dauers stained with DAPI  
864 (green). Arrowheads denote the anterior and posterior ends of the developing gonad arms.

865



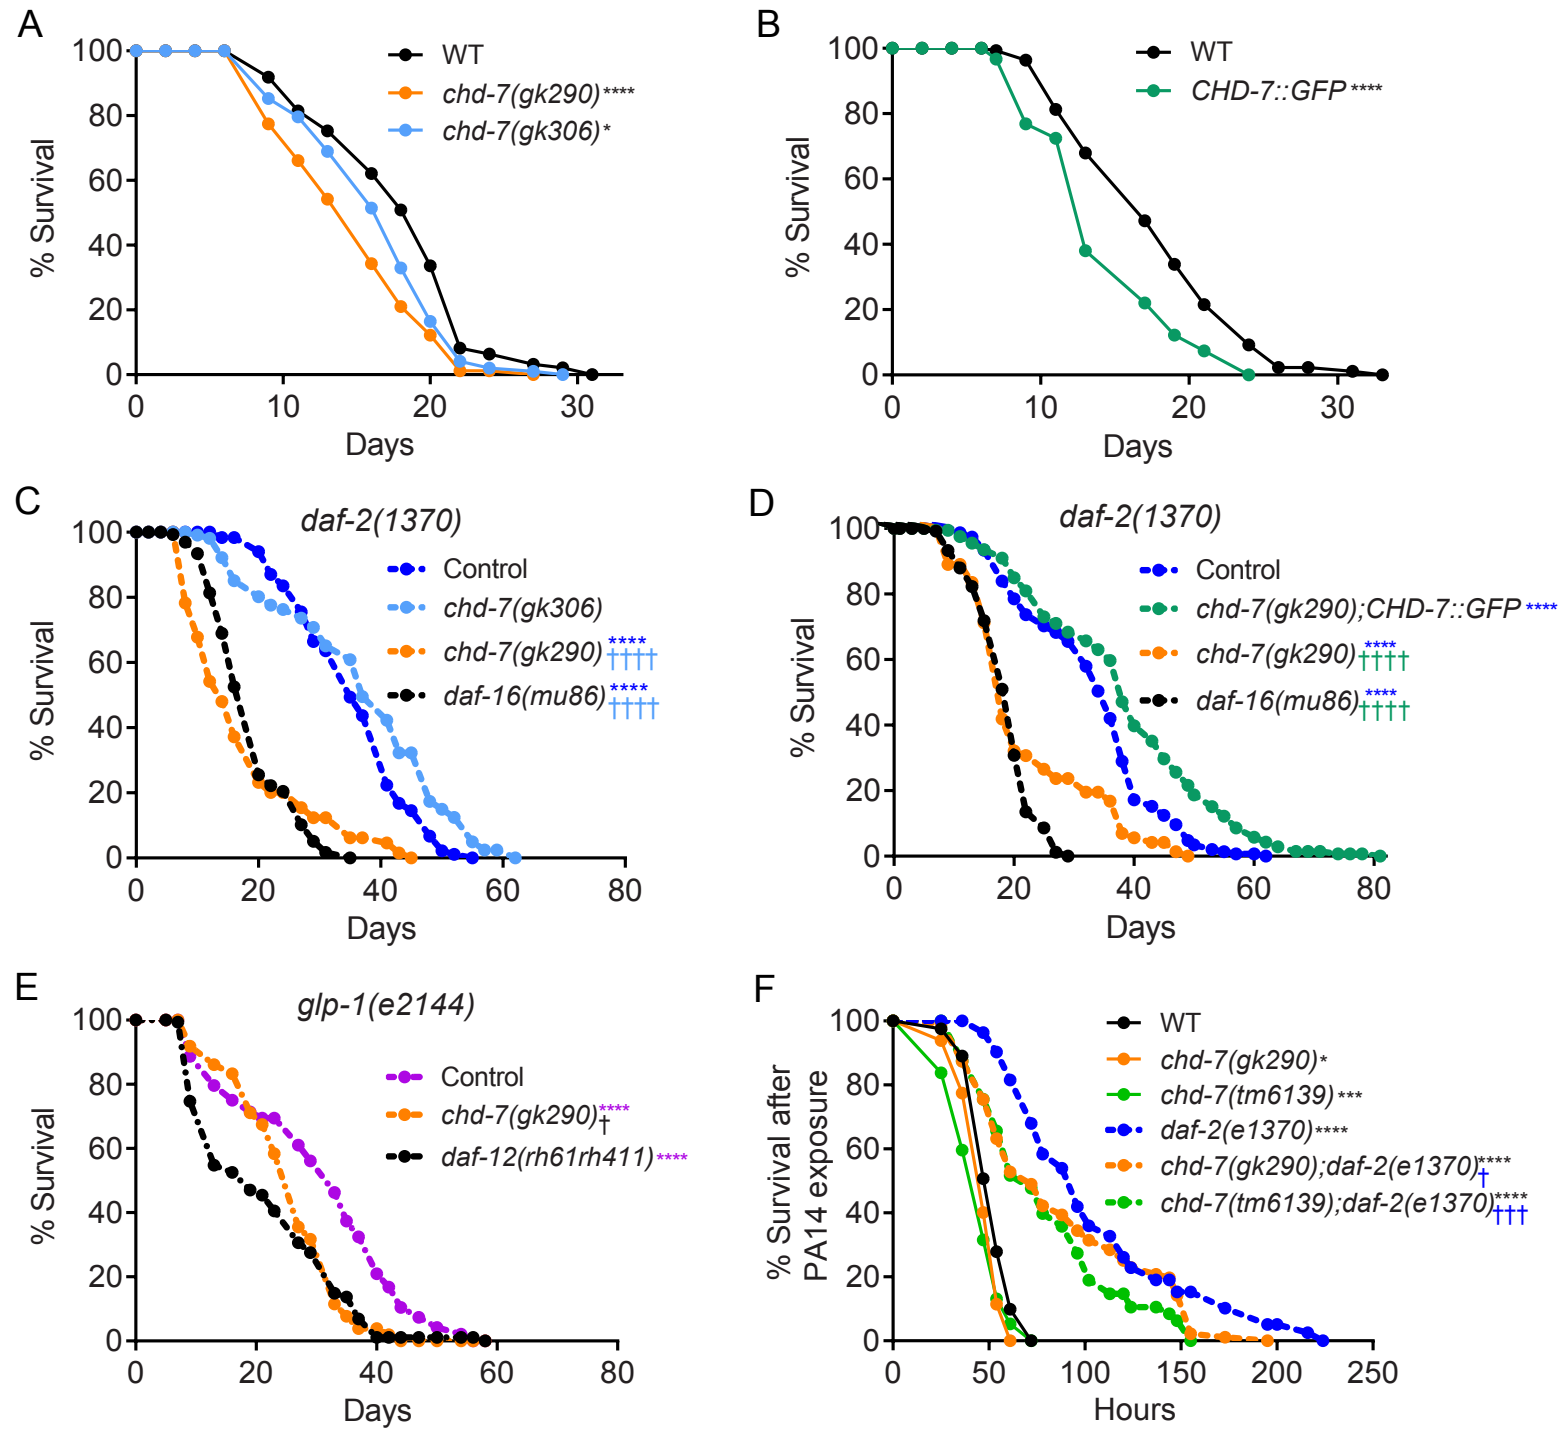

866 **Figure 2: *chd-7* affects longevity and response to pathogen.**

867

868 A-E) *chd-7* promotes longevity in wild-type, *daf-2(e1370)* and *glp-1(e2144)* mutants. Mean survival days  
869 on OP50-1; survival data analyzed using Kaplan–Meier test.

870 A) WT (18.12 days), *chd-7(gk290)* (14.91), *chd-7(gk306)* (16.53). \* $p < 0.05$  and \*\*\*\* $p < 0.0001$  compared to  
871 the wild-type, N2 strain.

872 B) WT (17.85), CHD-7::GFP (14.35). \*\*\*\* $p < 0.0001$  compared to the wild-type, N2 strain.

873 C) *daf-2(e1370)* (35.58), *chd-7(gk306);daf-2(e1370)* (37.18), *chd-7(gk290);daf-2(e1370)* (17.47), *daf-*  
874 *16(mu86);daf-2(e1370)* (18.85). \*\*\*\*, ††† $p < 0.0001$ . \*represents comparison to *daf-2(e1370)*; †represents  
875 comparison to *chd-7(gk306);daf-2(e1370)*.

876 D) *daf-2(e1370)* (27.9), *chd-7(gk290);daf-2(e1370);CHD-7::GFP* (30.84), *chd-7(gk290);daf-2(e1370)*  
877 (19.13), *daf-16(mu86);daf-2(e1370)* (14.48). \*\*\*\*, ††† $p < 0.0001$ . \*represents comparison to *daf-2(e1370)*;  
878 †represents comparison to *chd-7(gk290);daf-2(e1370);CHD-7::GFP*.

879 E) *glp-1(e2144)* (30.4), *chd-7(gk290);glp-1(e2144)* (28.37), *glp-1(e2144);daf-12(rh61rh411)* (25.99). \*\*\*\* $p$   
880  $< 0.0001$  and † $p < 0.05$ . \*comparison to *glp-1(e2144)*; †comparison to *glp-1(e2144);daf-12(rh61rh411)*.

881 Details of number of animals and other data from replicates found in Supplemental Table 2.

882 F) *chd-7* mediates the response against the opportunistic bacteria *P. aeruginosa*. Mean lifespan in hours  
883 (m)  $\pm$  standard error of the mean (SEM). 'n' is the number of animals analyzed/total number in  
884 experiment. WT (m = 52.11  $\pm$  0.96, n = 94/162), *chd-7(gk290)* (m = 47.45  $\pm$  1.05, n = 54/130), *chd-*  
885 *7(tm6139)* (m = 44.47  $\pm$  1.57, n = 56/80), *daf-2(e1370)* (m = 105.46  $\pm$  5.61, n = 65/115), *chd-*  
886 *7(gk290);daf-2(e1370)* (m = 86.74  $\pm$  4.21, n = 103/120) and *chd-7(tm6139);daf-2(e1370)* (m = 79.13  $\pm$   
887 4.9, n = 50/60). \*, † $p < 0.05$ ; \*\*\*, ††† $p < 0.001$  and \*\*\*\* $p < 0.0001$ . \*comparison to N2; †comparison to *daf-*  
888 *2(e1370)*. Survival data analyzed using Kaplan–Meier test.

889



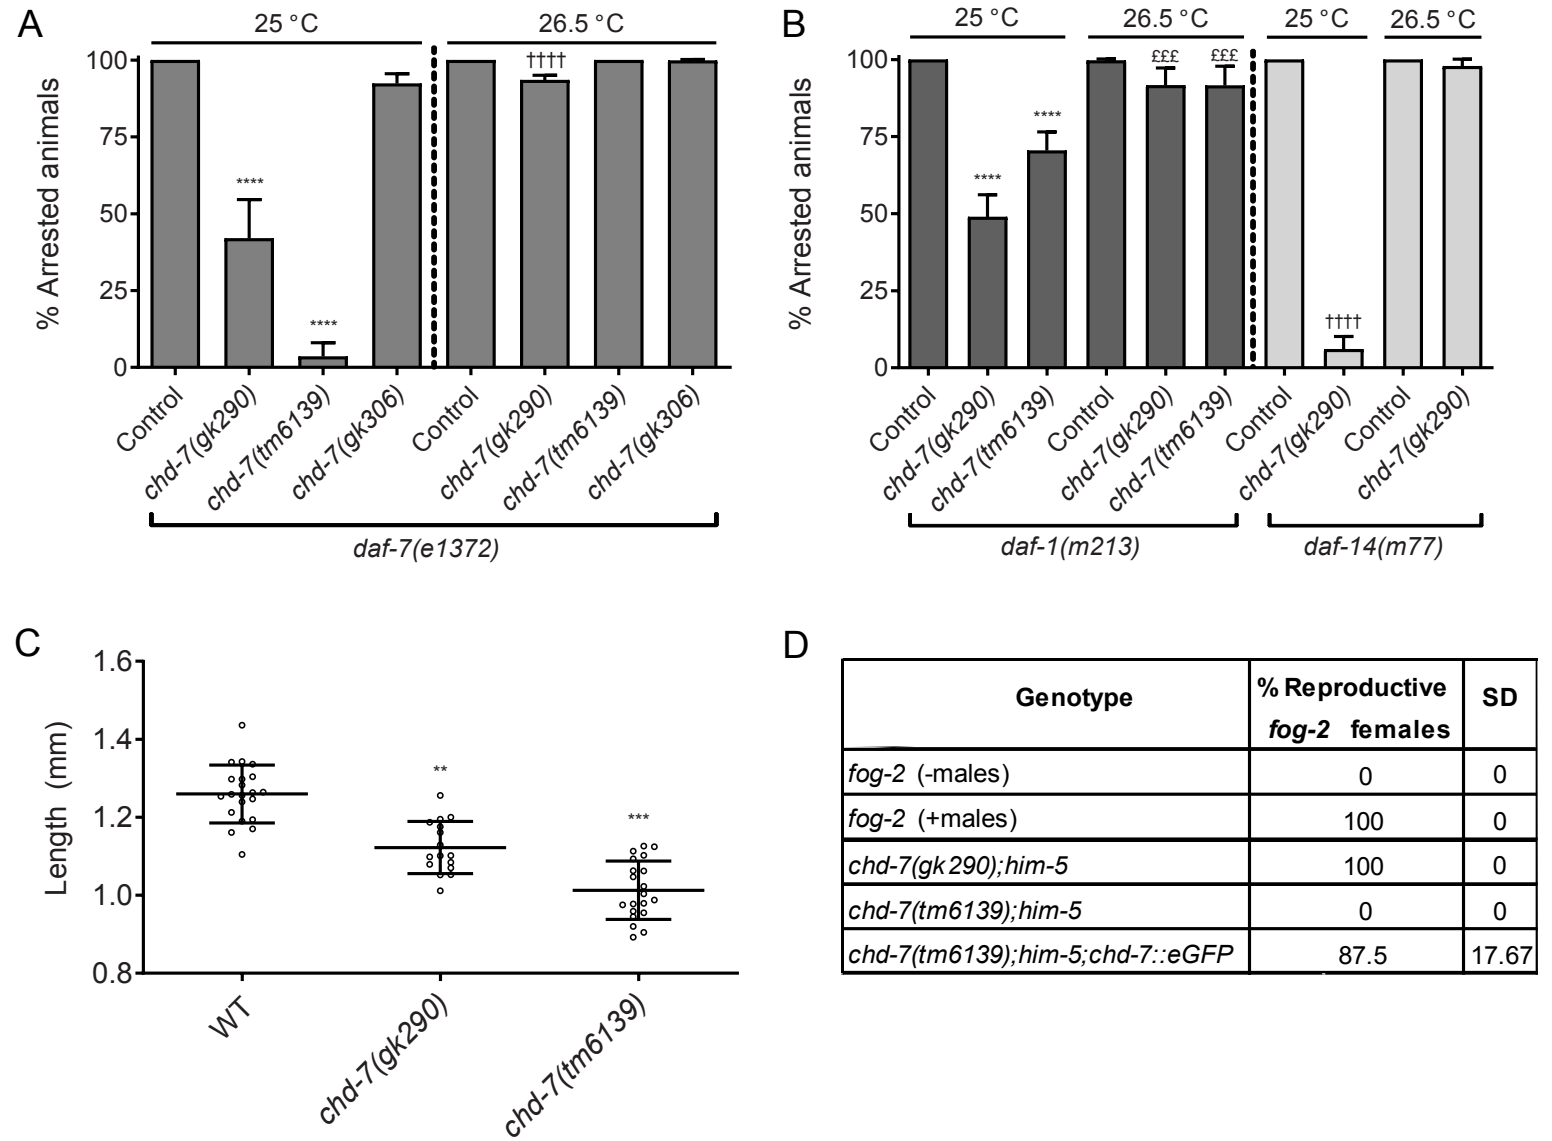

890 **Figure 3: CHD-7 belongs to the TGF- $\beta$  signaling pathway.**

891

892 A-B) Loss of *chd-7* suppresses dauer arrest of TGF- $\beta$  pathway mutants at 25°C but not 26.5°C. 7 L4's  
893 were plated individually and grown at the specified temperature for 1 week when arrested and non-  
894 arrested progeny were scored. Bars and horizontal black lines represent mean percentage with SD.  
895 Statistical significance was calculated using Chi-squared test with Bonferroni correction for multiple  
896 comparisons. \*\*\*\*, †††† p<0.0001 and £££ p <0.001.

897 A) Quantification of dauer arrest in *chd-7;daf-7(e1372)* mutants. \* comparison to *daf-7(e1372)* grown at  
898 25°C and † comparison to *daf-7(e1372)* at 26.5°C.

899 B) Dauer arrest in TGF- $\beta$  pathway mutant backgrounds. \* comparison to *daf-1(m213)* grown at 25°C,  
900 † comparison to *daf-14(m77)* at 25°C; £ comparison to *daf-1(m213)* at 26.5°C.

901 C) *chd-7* regulates body size. Body length of day 1 adults at 20°C (n>16). One-way Anova, \*\*p<0.01,  
902 \*\*\*p<0.001 compared to wild-type, N2 strain.

903 D) *chd-7(tm6139)* males do not mate. 8 males from each strain tested were plated with 4 *fog-2* females  
904 on 10 cm plates. After 24 hrs, *fog-2* females were transferred to new plates and within 48h the proportion  
905 of fertile females were scored. Assay was repeated twice.

906

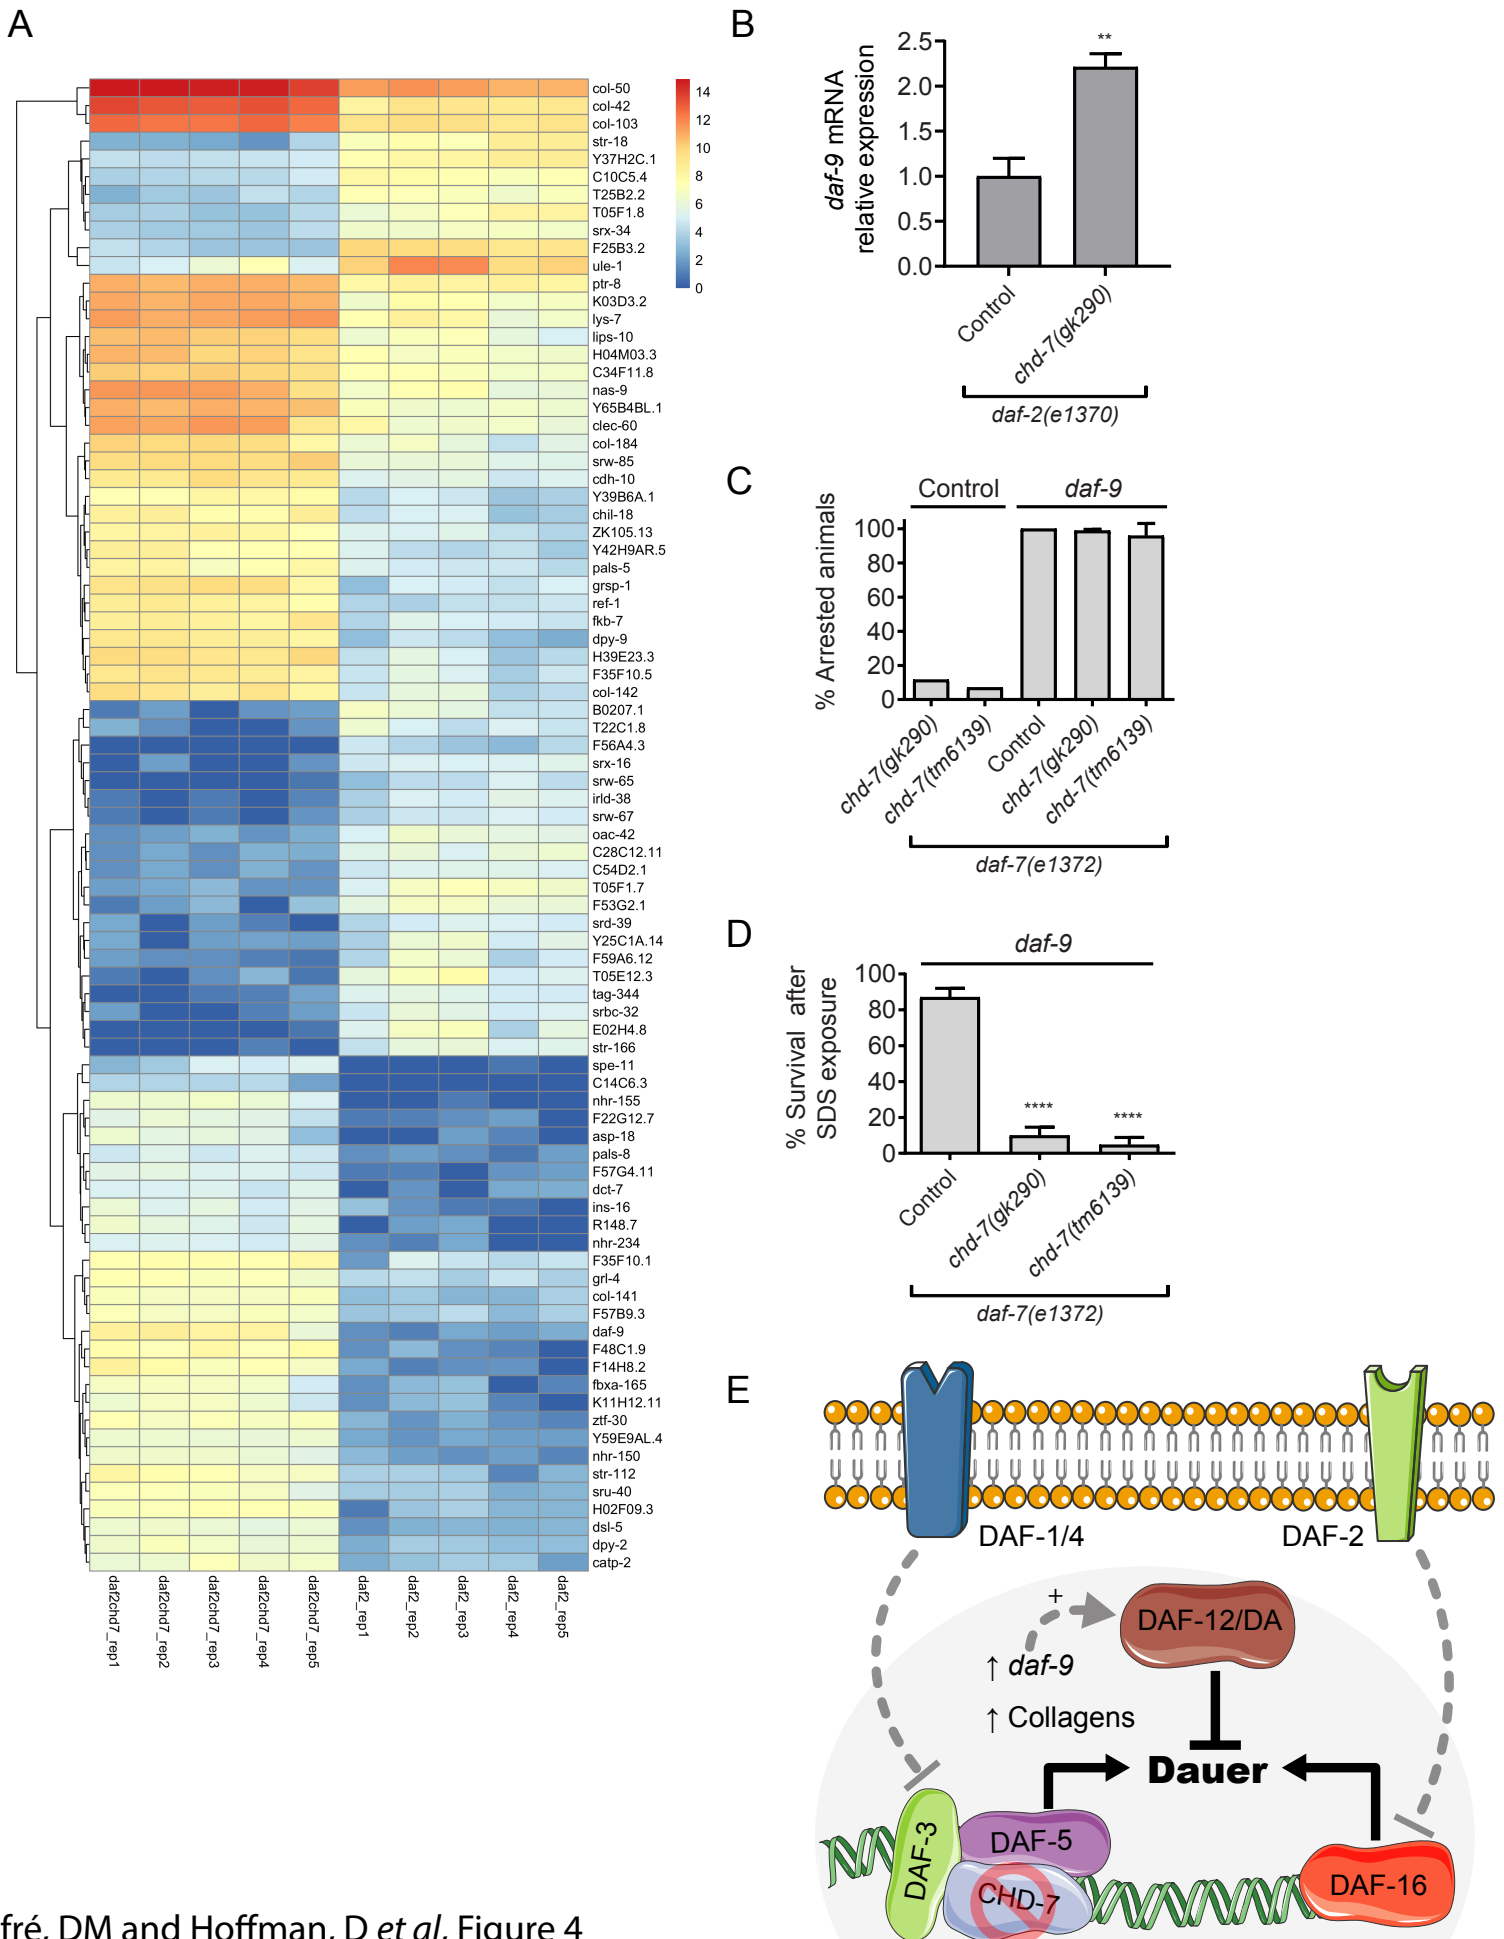

Jofré, DM and Hoffman, D *et al*, Figure 4

907 **Figure 4: RNA-Seq analysis of transcriptome changes in *chd-7(gk290)* mutant dauers.**

908

909 A) Heat map of expression values for the 84 differentially expressed genes (DEGs, cutoff of 0.05 on  
910 FDR). DEGs were determined using DESeq2 (version 1.20.0). The color scale represents row z-score.  
911 Hierarchical clustering of the DEGs is represented by dendrograms at the left.

912 B) Expression levels of *daf-9* mRNA are increased in *chd-7(gk290);daf-2(e1370)* partial dauers. Error  
913 bars indicate standard error from three repeats with different biological samples. Two-tailed unpaired t-  
914 test. \*\*p <0.01.

915 C) *daf-9* knockdown in *chd-7;daf-7(e1372)* animals rescues dauer arrest at 25°C. 2-3 young L4's were  
916 plated on to freshly seeded plates with either *daf-9* or Control empty vector RNAi and allowed to lay eggs.  
917 After 72h, the adults were removed and the proportion of progeny that arrested as dauers was calculated.  
918 Each dot represents a plate of at least 34 animals (n>598 total animals/ strain). Bars and horizontal black  
919 lines represent mean percentage with SD. One-way ANOVA.

920 D) *daf-9* RNAi rescues arrest in *chd-7;daf-7(e1372)* animals but leads to partial dauers. Arrested animals  
921 grown at 25°C on *daf-9* RNAi plates were treated with 1% SDS for 30 min and survival was scored.  
922 n>159 total animals/ strain Each dot represents a plate of at least 30 animals and a minimum of 159 total  
923 animals per strain tested. Bars and horizontal black lines represent mean percentage with SD. One-way  
924 ANOVA, \*\*\*\*p <0.0001, compared to *daf-7(e1372)*.

925 E) Proposed mechanism of action for *chd-7* in dauer development. Under dauer-inducing conditions,  
926 CHD-7 forms a transcriptional complex with DAF-3/DAF-5 to repress *daf-9* expression. In *chd-7* mutants,  
927 *daf-9* expression prevents dauer formation driven by reduced activity of both DAF-7/TGF- $\beta$  and DAF-2/IIS  
928 signaling pathways, presumably by binding dafachronic acids (DA) and subsequent activation of DAF-12.

929

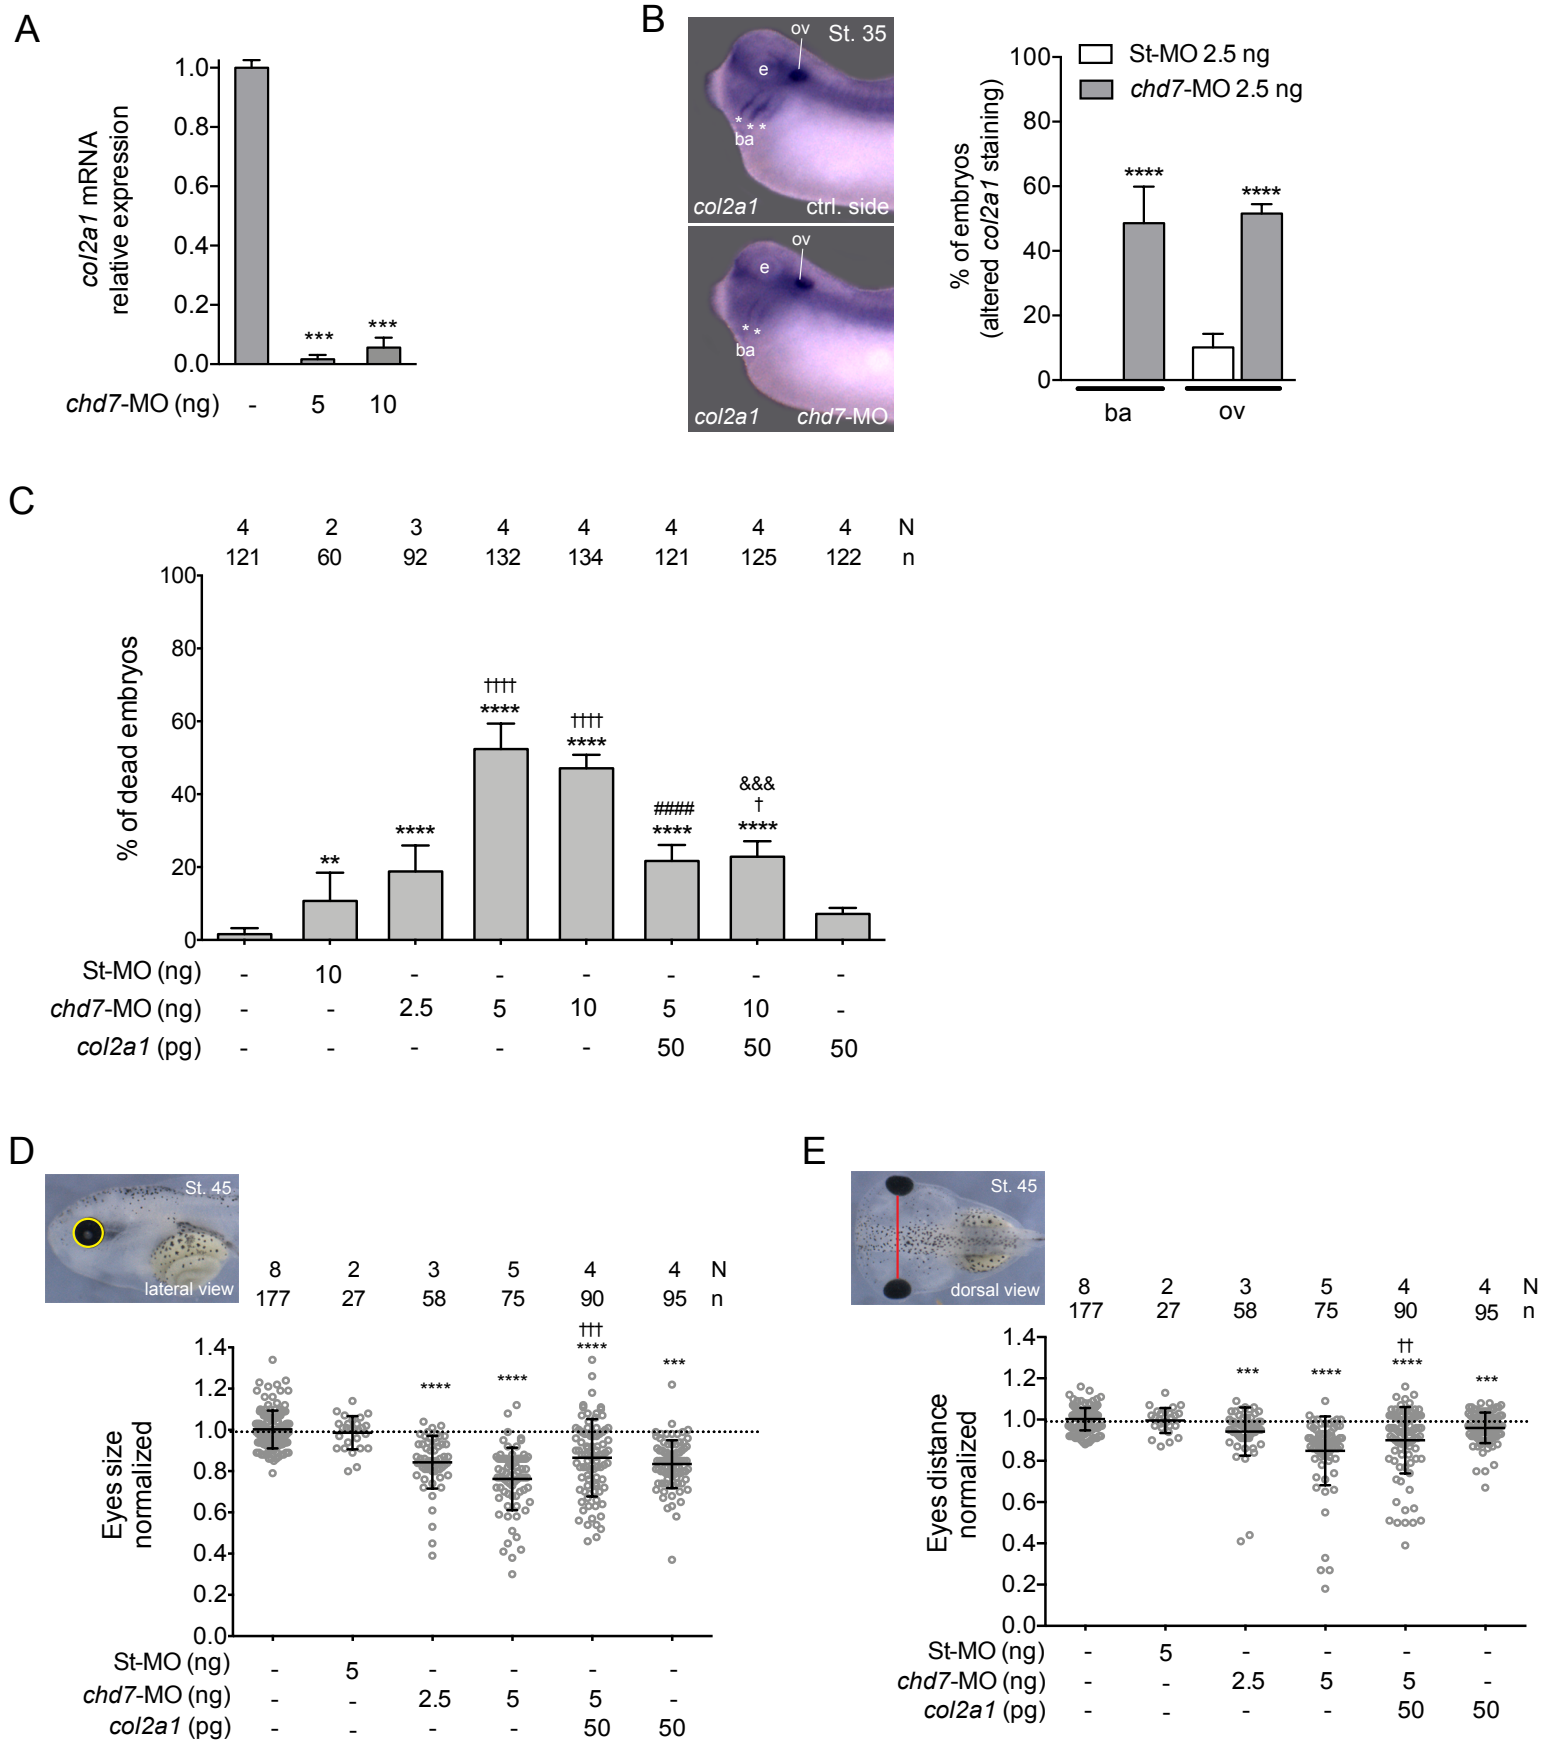

930 **Figure 5: Expression of *col2a1* rescues Chd-7 knock-down in *Xenopus* embryos.**

931

932 A) Expression levels of *col2a1* mRNA are reduced in *chd7*-MO injected embryos. Both blastomeres of 2-  
933 cell staged embryos were injected with 5 or 10 ng of *chd7*-MO. Error bars indicate standard error from two  
934 repeats of the PCR reaction with different biological samples. One-tailed paired t-test, \*\*\* $p < 0.001$ .

935 B) *Col2a1* expression domain is altered in the branchial arches (ba) and otic vesicle (ov) of Chd7-  
936 depleted embryos. *In situ* hybridization of stage (St.) 35 embryos for *col2a1*. Lateral views, anterior to the  
937 left. One D1 blastomeres of 8-cell staged embryos was injected with 2.5 ng of St-MO or *chd7*-MO (N = 2;  
938 42 and N = 3; 71, respectively) (N = number of experiments; number of embryos). Top and bottom panels  
939 are control and injected sides of the same representative *chd7*-MO injected embryo, respectively. e: eye.  
940 The graph is a quantification of the results. Reduced *col2a1* staining was observed in 18% of St-MO and  
941 77% of *chd7*-MO injected embryos. Data on graph is presented as means with standard error. Fisher's  
942 exact test (\*\*\*\* $p < 0.0001$ ). \* represents comparison to St-MO group.

943 C) Lethality in Chd-7-depleted embryos is rescued by over-expression of *col2a1*. Graph showing the  
944 percentage of dead embryos. Both D1 blastomeres of 8-cell staged embryos were injected as indicated in  
945 the graph and scored for survival at St. 45. Data on graph is presented as means with standard error.  
946 Fisher's exact test ( $\dagger p < 0.05$ , \*\* $p < 0.01$ , && $p < 0.001$ , \*\*\*\* $p < 0.0001$ ,  $\dagger\dagger\dagger\dagger p < 0.0001$ ). \* represents comparison to  
947 uninjected group,  $\dagger$  represents comparison to St-MO group, #,& represent comparison to *chd7*-MO 5 ng  
948 and 10 ng, respectively.

949 D-E) Craniofacial morphometric analysis of *Xenopus* tadpoles at St. 45. Embryos were injected as  
950 indicated in panel C. Each dot represents a single embryo. Means and standard deviation are indicated.  
951 One-way ANOVA and Tukey's multiple comparisons test. D) Quantification of the eye size (top left panel).  
952 \*\*\* $\dagger\dagger p < 0.001$ , \*\*\*\* $p < 0.0001$ . E) Quantification of the eye distance (top left panel).  $\dagger\dagger p < 0.01$ , \*\*\* $p < 0.001$ ,  
953 \*\*\*\* $p < 0.0001$ . Lateral views, anterior to the left. \* represents comparison to uninjected group and  $\dagger$   
954 represents comparison to *chd7*-MO 5 ng injected group. N = number of experiments, n = number of  
955 embryos.

## SUPPLEMENTAL FIGURES

A

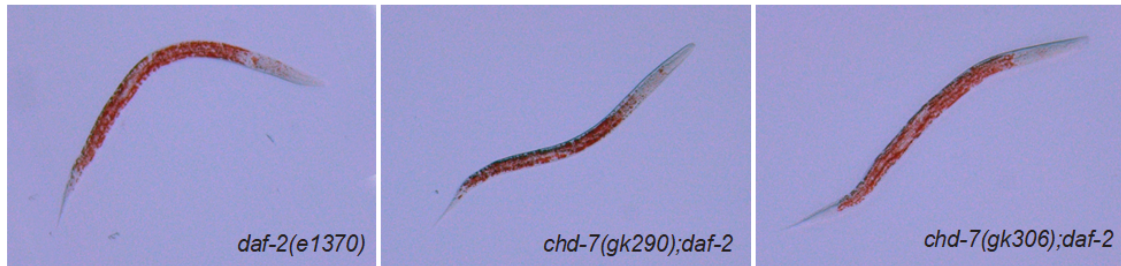

B

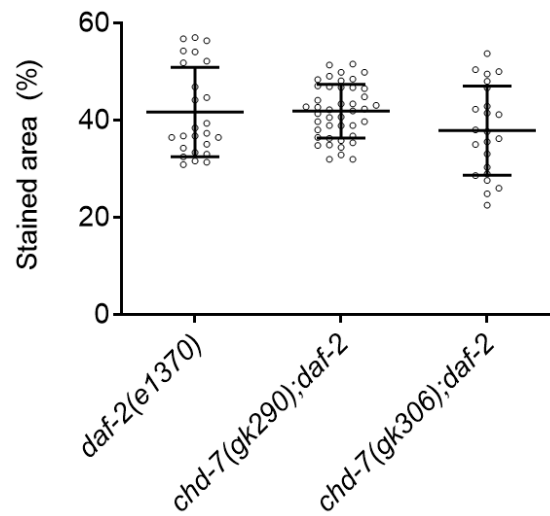

**Figure S1: *chd-7* does not affect fat storage.** Dauers of the shown genotypes were grown at 25°C for 5 days prior to lipid staining with Oil Red O (ORO). A. Representative photomicrographs of ORO-stained worms. B. Quantification of total area of ORO staining/worm (Image J, see methods) reveals no significant differences in fat accumulation between control and *chd-7* mutants. Three biological replicates were scored with at least 16 individual dauers per replicate. Horizontal black lines represent mean with SD.  $P > 0.05$ , Student's t test.

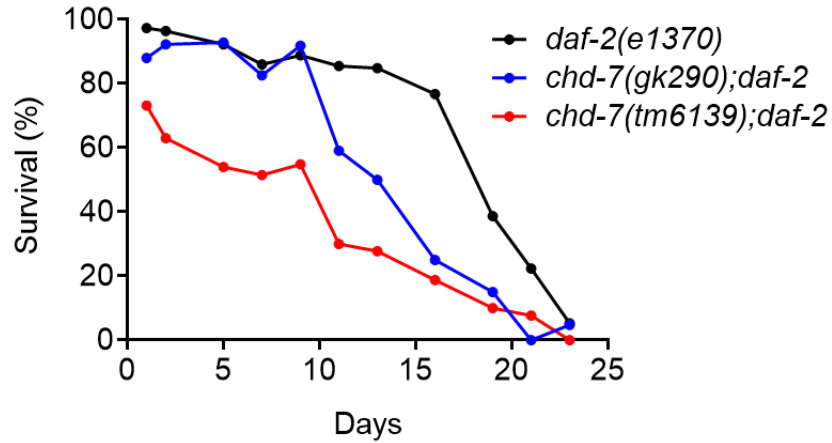

**Figure S2: Loss of *chd-7* reduces L1 starvation survival in *daf-2(e1370)* mutants.** L1 animals hatched from bleached egg preps into sterile M9 with 0.1µg/ml of streptomycin were diluted to a density of 1 larva/µl and kept at 20°C with constant agitation. Every 48h, 100µl aliquot was spotted onto a seeded NGM plate, and scored 72h later for development beyond the L2 larval stage. Percentage of the population alive was obtained by comparing the initial number of worms at t=0. Each dot represents at least 50 L1 worms.



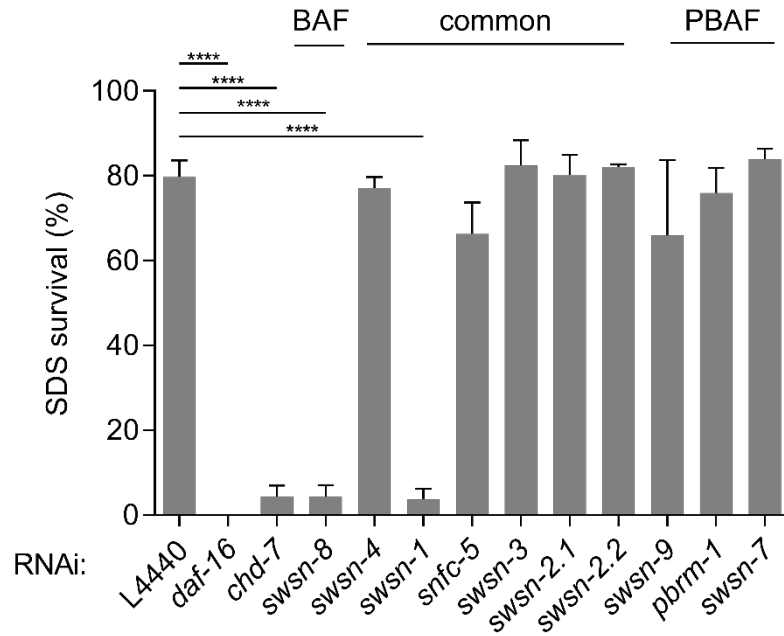

**Figure S3: *swsn-1* and *swsn-8* share dauer suppression phenotypes with *chd-7*.** *daf-7(e1372)* L1 synchronized larvae were placed on the indicated RNAi bacteria and grown at 25°C for 4 days to induce dauer formation. Dauer were identified after 4-5 days based on morphology and their resistance to 1% SDS for 15 min. Common SWI/SNF subunits and BAF or PBAF subclasses are indicated on top. Lines above bars represent standard error of the mean (SEM) from three independent experiments. At least 60 animals were assayed for each RNAi. One-way ANOVA. \*\*\*\* $p < 0.0001$ . \*comparison to the control, L4440 RNAi.

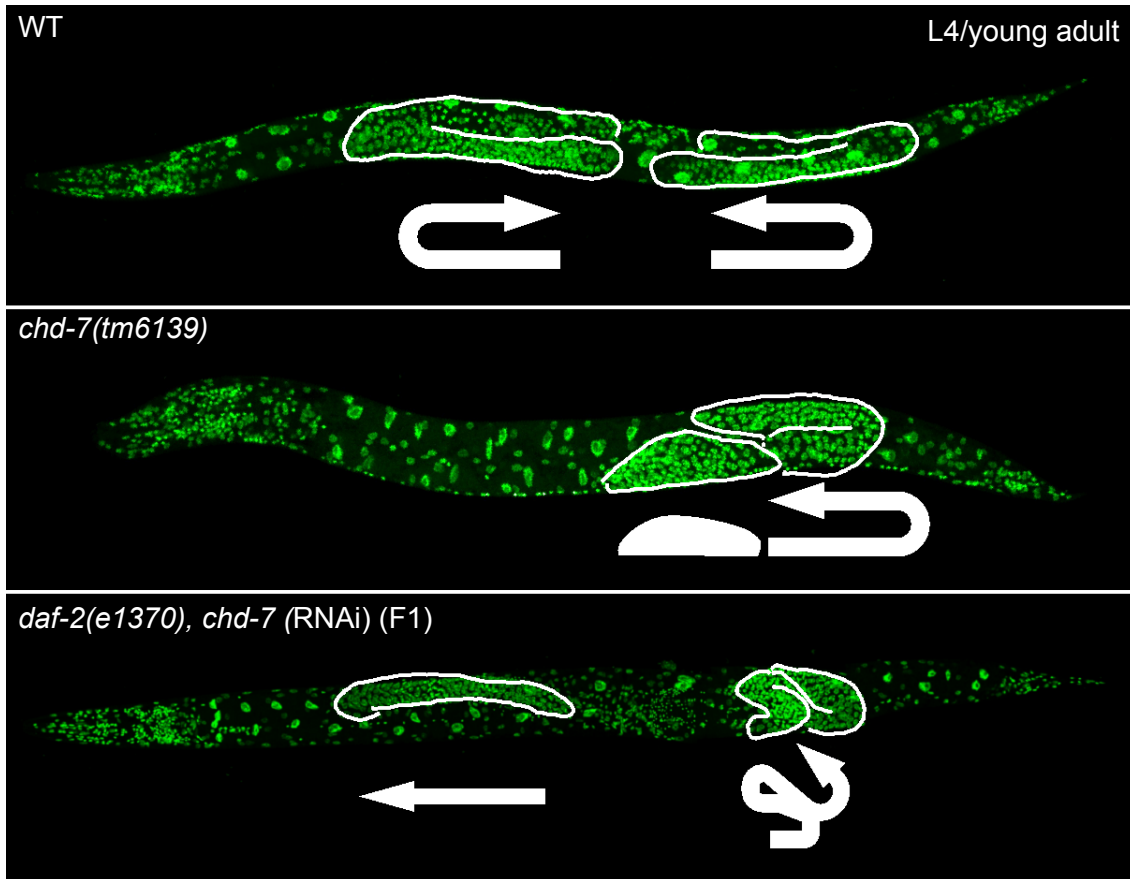

**Figure S4: *chd-7* mutants show altered gonad proliferation and migration.** Whole mount fixation and DAPI (green) staining of late L4/young adult animals from the relevant strains. RNAi sample was obtained by growing *daf-2(e1370)* for two generations on *chd-7* dsRNA-producing E.Coli-.

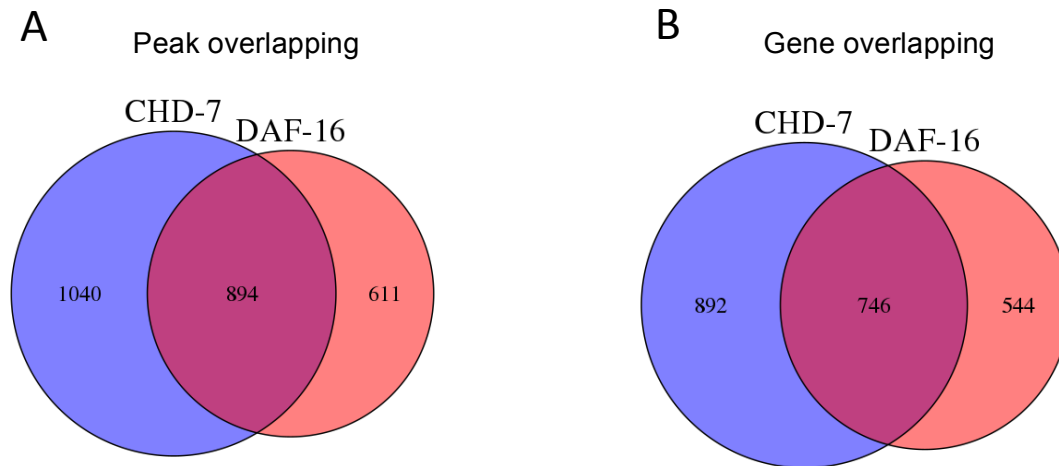

**Figure S5: ChIP-seq analysis of CHD-7 and DAF-16 from ModEncode.** Comparison of gene lists from peak calling of CHD-7::GFP (young adult) and DAF-16::GFP (L4) using Homer software. A) Venn diagram of ChIP peaks for CHD-7 and DAF-16. Overlap was defined as sharing at least one base in common. B) Common genes shared by CHD-7::GFP and DAF-16::GFP peaks. CHIP-seq data was obtained from publicly available data from the ModEncode project.

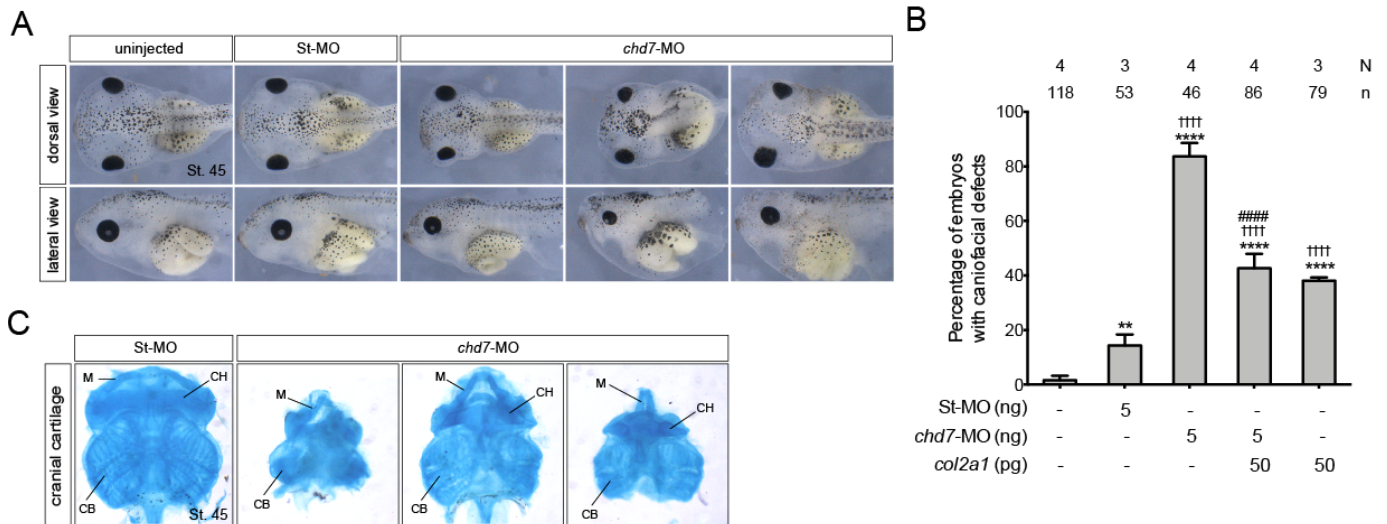

**Figure S6: Craniofacial defects of *Chd7* knock-down *Xenopus* tadpoles.** A) Gross morphology of surviving tadpoles at St. 45. Embryos were injected into both D1 blastomeres at the 8-cell stage with St-MO (5 ng) and *chd7*-MO (5 ng) as indicated. Tadpoles position is anterior to the left. Embryos are representative. B) Quantification of *Xenopus* tadpoles with craniofacial defects at stage 45. Embryos were injected as indicated in A and in the graph. Data on graph is presented as means with standard error. Fisher's exact test (\*\* $p < 0.01$ , \*\*\*\* $p < 0.0001$ , †††† $p < 0.0001$ , #### $p < 0.0001$ ). \*comparison to uninjected group, † comparison to St-MO group, # comparison to *chd7*-MO group. N = number of experiments, n = number of embryos. C) Examples of Alcian blue-stained craniofacial skeletal elements from St. 45 tadpoles injected with St-MO (5 ng) and *chd7*-MO (5 ng). M: Meckel's, CH: ceratohyle and CB: ceratobranchial cartilages. *chd7*-MO injected tadpoles presented a high incidence of gross head malformations, reduced head and eyes sizes, and abnormal development of craniofacial cartilages.
